# Supplementary material for: Genome-wide identification, evolution, expression, and alternative splicing profiles of peroxiredoxin genes in cotton
Source: PeerJ journal article supplement (doi:10.7717/peerj.10685), 2021-01-18
Supplement: Figure_S1.pdf [file Figure_S1.pdf]

|         |              |                                                                                                                                    |
|---------|--------------|------------------------------------------------------------------------------------------------------------------------------------|
| PRXIIF  | AT3G06050    | [ 59 ] SSKFSTTPLSDIFKGGKVVIFGL <b>PGAYTGVC</b> SQQHVPSYKSHIDKFKAKGIDSVI <b>CVSV</b> VNDPFAING <b>WAE</b> KLGA <b>KDA</b> IE        |
| PRXIIF  | Os01g0266600 | [ 56 ] ATNFSTTPLKDI FHGKKVVIFGL <b>PGAYTGVC</b> SQAHVPSYKNNIDKLLKAKGVDSVI <b>CVSV</b> VNDPYALNG <b>WAE</b> KLQAK <b>DA</b> IE      |
| PRXIIF  | GhPRX6-A     | [ 56 ] TSNFSTTSVNDIFKGGKVVIFGL <b>PGAYTGVC</b> SQQHVPSYKKNIDKFKAKRIDSVI <b>CV</b> <b>A</b> INDPYVMNA <b>WAD</b> KLQAK <b>DV</b> IE |
| PRXIIF  | GhPRX14-D    | [ 56 ] TSNFSTTSVNDIFKGGKVVIFGL <b>PGAYTGVC</b> SQQHVPSYKKNIDKFKAKGIDSVI <b>CV</b> <b>A</b> VNDPYVMNA <b>WAD</b> KLQAK <b>DV</b> IE |
| PRXII E | AT3G52960    | [ 91 ] TGDVKT VTVSSLTAGKKTILFAV <b>PGAFTPTCS</b> QKHVPGFVSKAGELRSKGIDVIA <b>CVSV</b> VNDAFVME <b>AWR</b> KDLGIND-EV                |
| PRXII E | Os06g0625500 | [ 89 ] DGELKT VTVRDLTAGKKVVLFAV <b>PGAFTPTCT</b> QKHVPGFVAKAGELRAKGVDAVA <b>CVSV</b> VNDAFVM <b>RAW</b> KESLGVD-EV                 |
| PRXII E | Os02g0192700 | [ 81 ] DGELKT VTVVAELTAGRKAVLFAV <b>PGAFTPTCS</b> QKHLPGFIEKAGELHAKGVDAIA <b>CVSV</b> VNDAFVM <b>RAW</b> KESLGLGDADV               |
| PRXII E | GhPRX1-A     | [ 84 ] DGELQTTTISSSLTAGKKAVIFAV <b>PGAFTPTCS</b> QKHLPGFVEKSGELKAKGVNTIA <b>CVSV</b> VNDAFVM <b>RAW</b> KENLG <b>IKD</b> -EV       |
| PRXII E | GhPRX8-D     | [ 84 ] DGELQTTTISSSLTAGKKT VIFAV <b>PGAFTPTCS</b> QKHLPGFVEKSGELKAKGVNTIA <b>CVSV</b> VNDAFVM <b>RAW</b> KENLG <b>IKD</b> -EV      |
| PRXIID  | AT1G60740    | [ 21 ] NDQLQTVSVHSIAAGKKVILFGV <b>PGAFTPTCS</b> MSHVPGFIGKAEELKSKGIDEI <b>CVSV</b> VNDPFVM <b>KAW</b> GKTY-QENKHV                  |
| PRXIIC  | AT1G65970    | [ 21 ] NDQLQTVSVHSIAAGKKVILFGV <b>PGAFTPTCS</b> MSHVPGFIGKAEELKSKGIDEI <b>CVSV</b> VNDPFVM <b>KAW</b> GKTY-PENKHV                  |
| PRXIIB  | AT1G65980    | [ 21 ] NDQLQTASVHSLAAGKKVILFGV <b>PGAFTPTCS</b> MKHVPGFIEKAEELKSKGVDEI <b>CVSV</b> VNDPFVM <b>KAW</b> GKTY-PENKHV                  |

\* . . \* \* \* : \* : : \* : :

\* :

\*
