# Supplementary material for: Genome-wide identification, evolution, expression, and alternative splicing profiles of peroxiredoxin genes in cotton
Source: PeerJ journal article supplement (doi:10.7717/peerj.10685), 2021-01-18
Supplement: Figure_S2.pdf [file Figure_S2.pdf]

Motif ID

LOGO

E-value

Motif 1

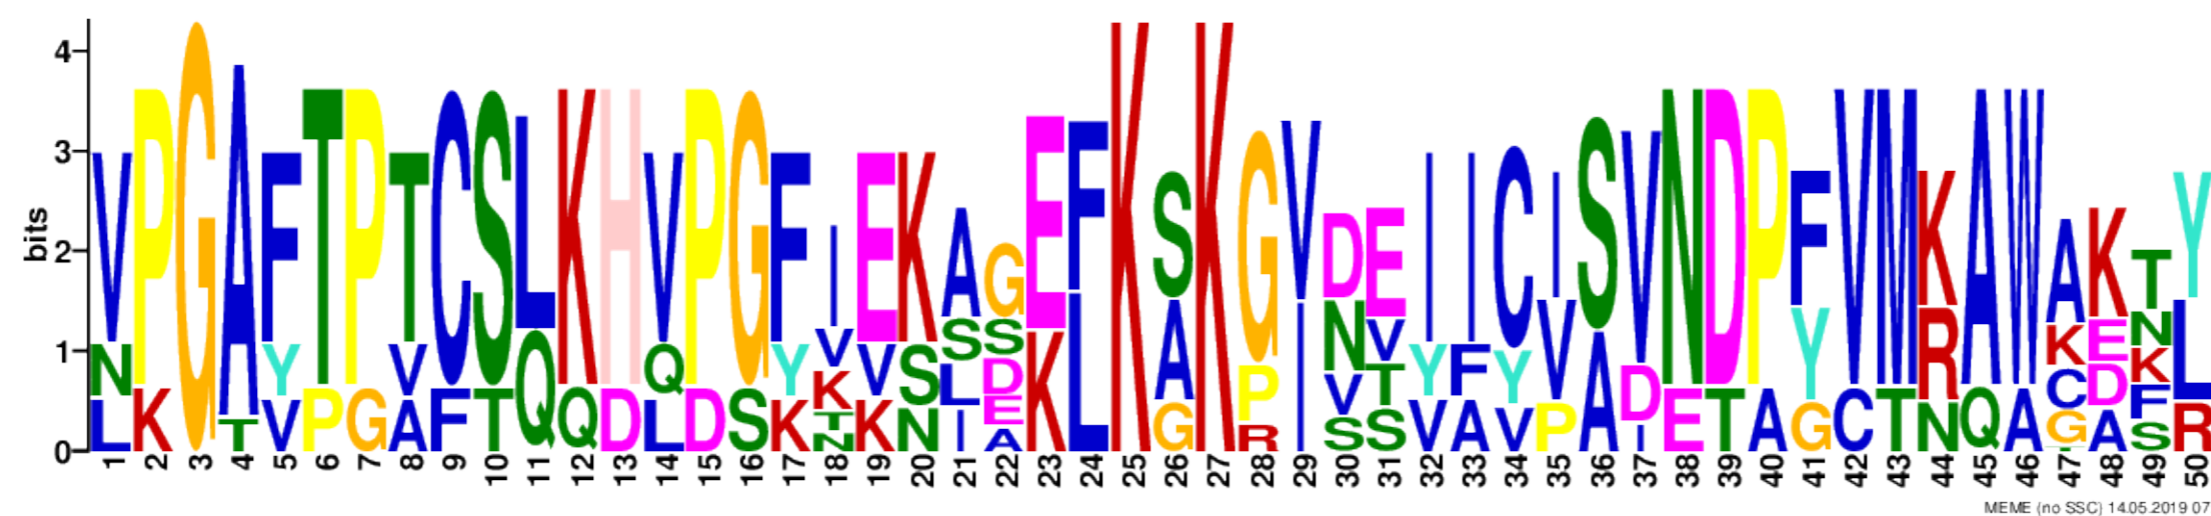

3.6e-1047

Motif 2

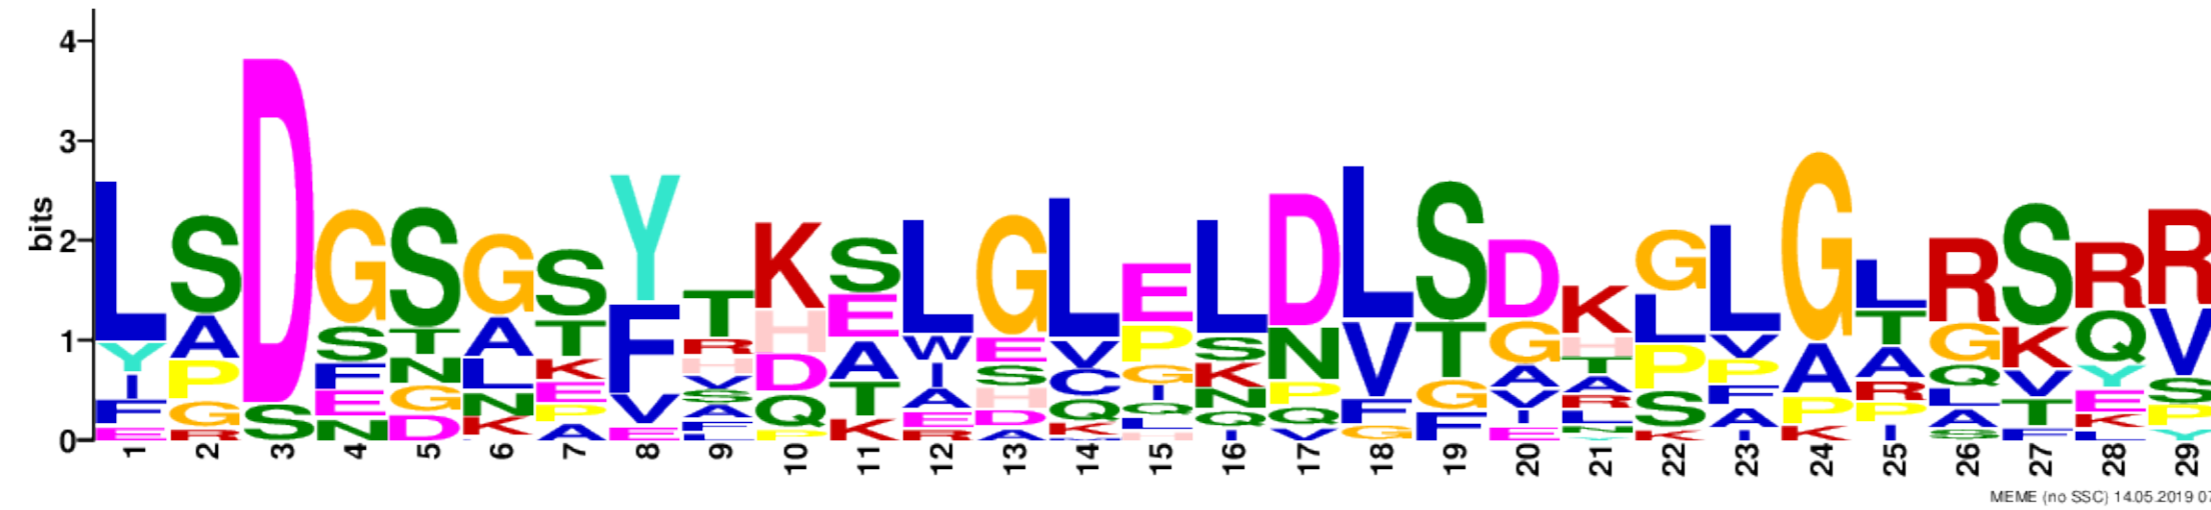

1.8e-432

Motif 3

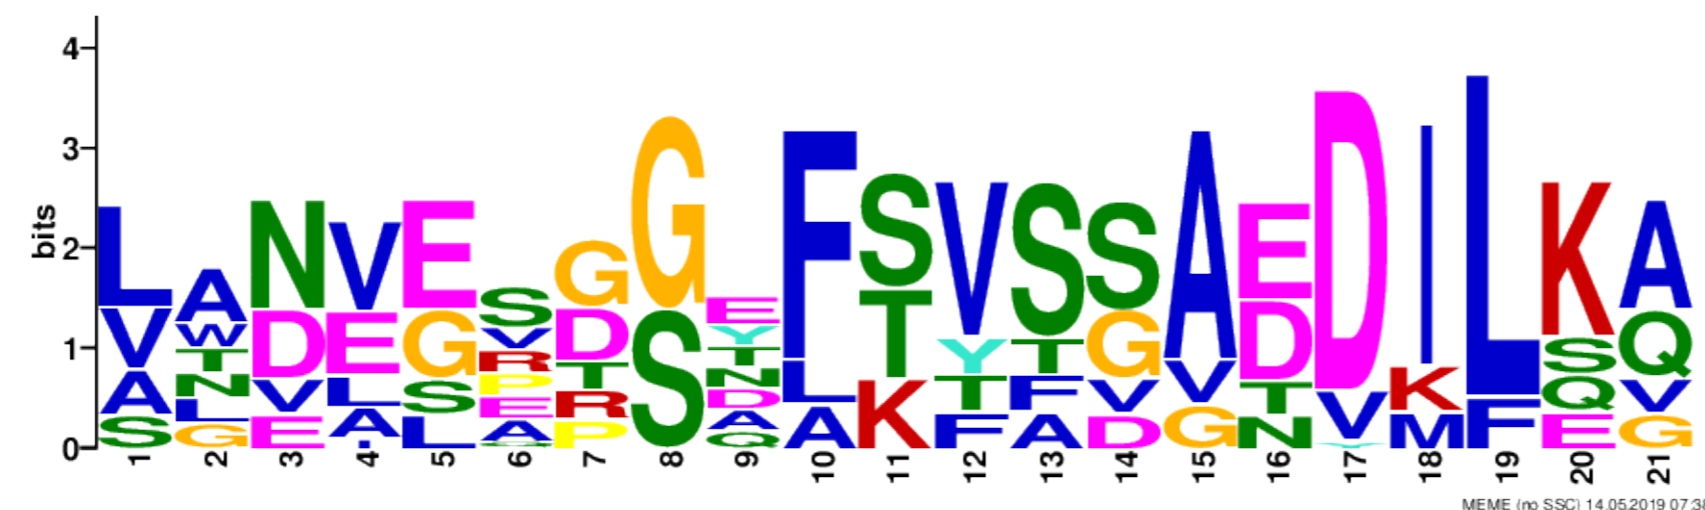

3.2e-297

Motif 4

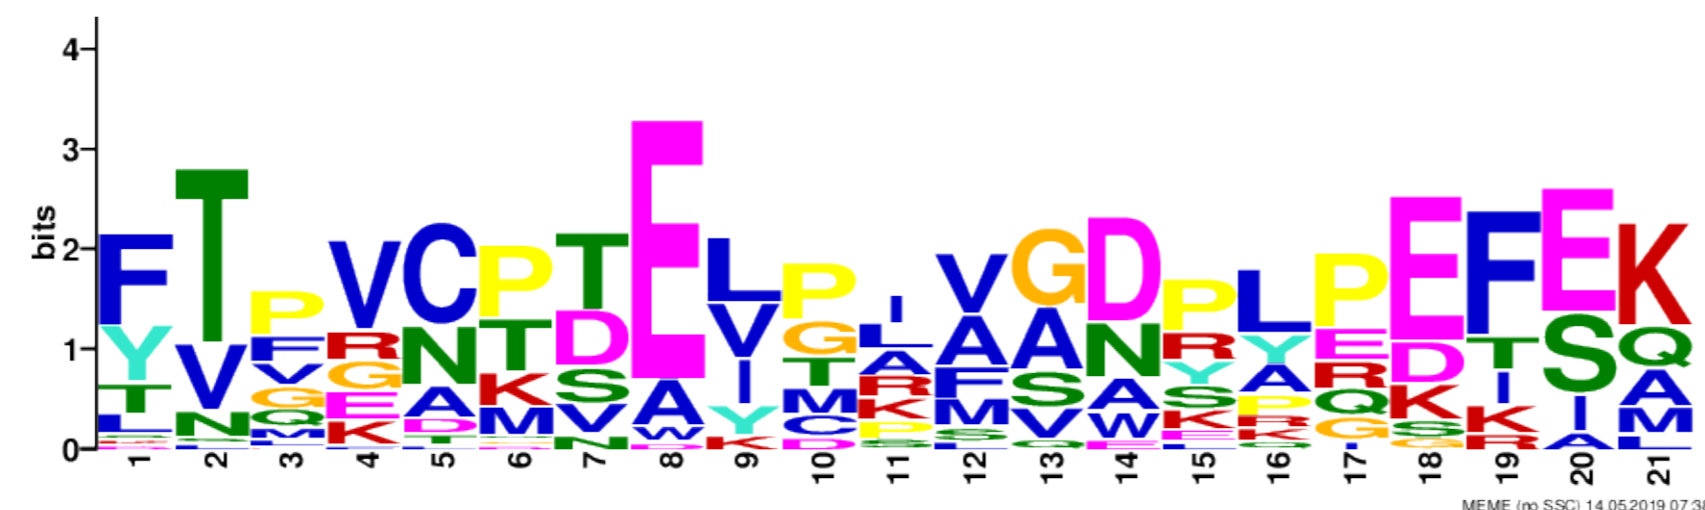

1.2e-242

Motif 5

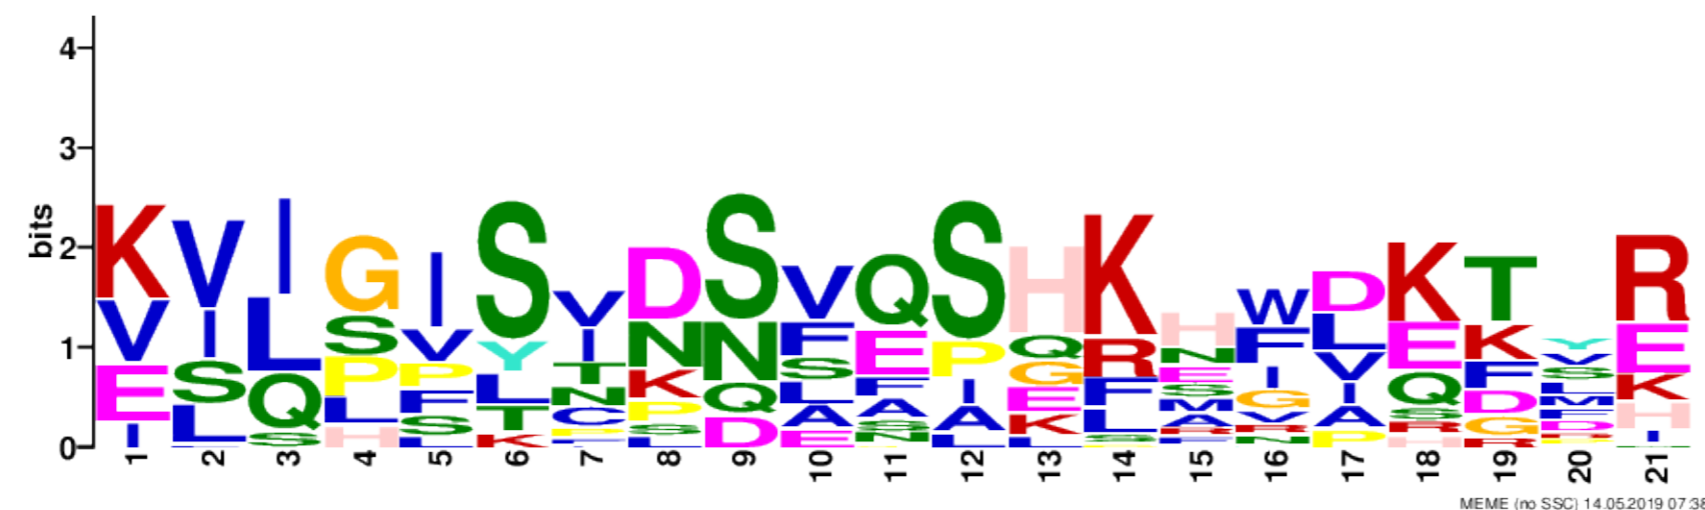

1.2e-212

Motif 6

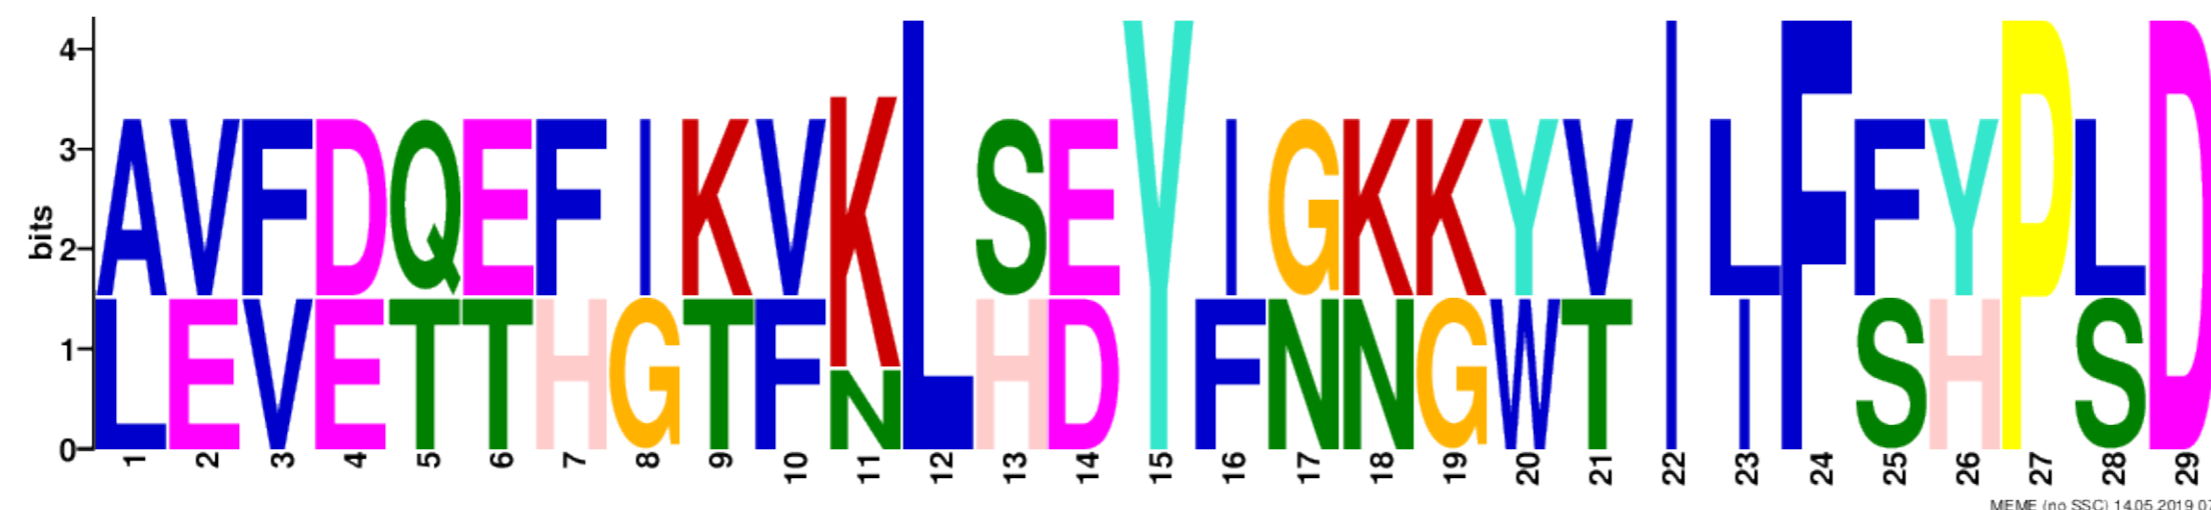

2.5e-195

Motif 7

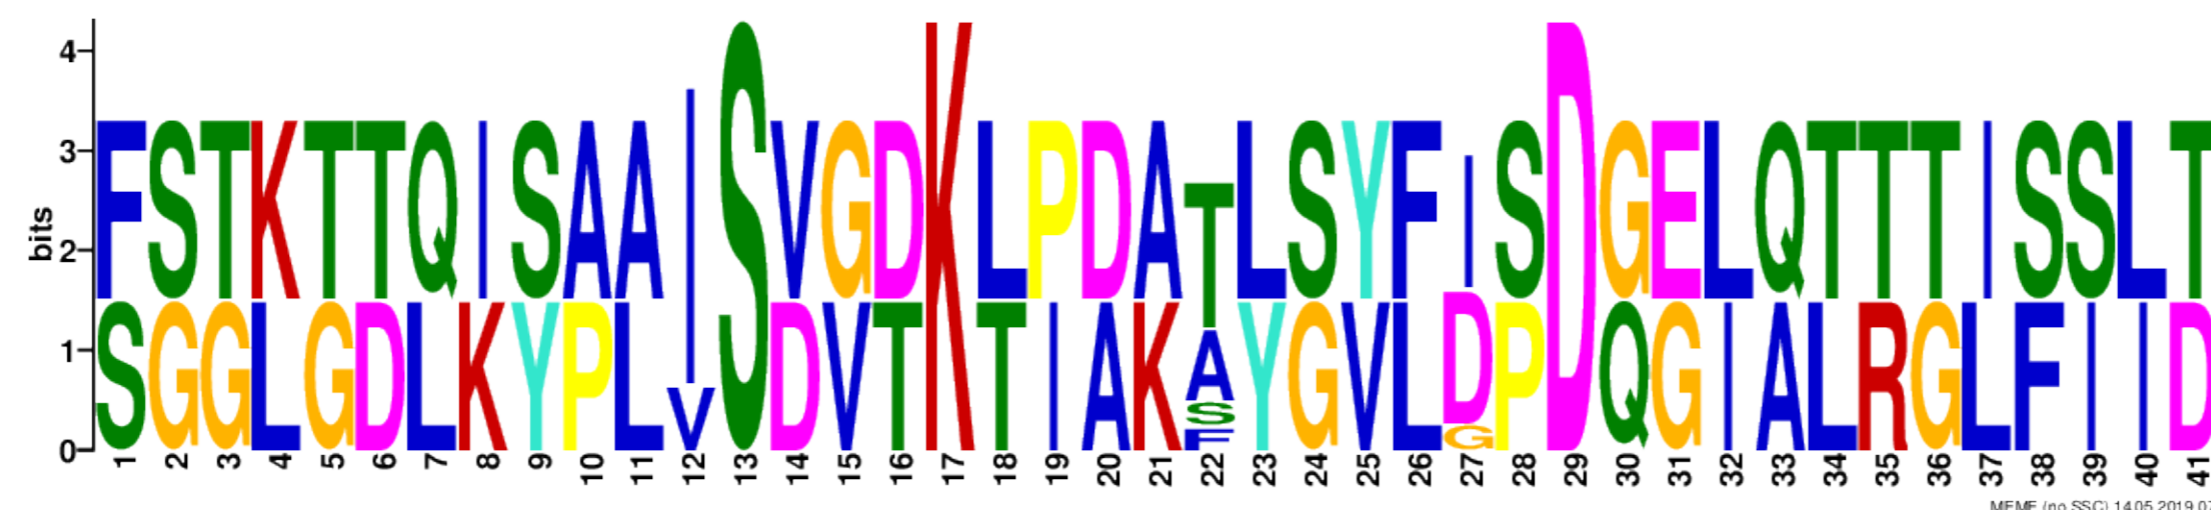

3.7e-155

Motif 8

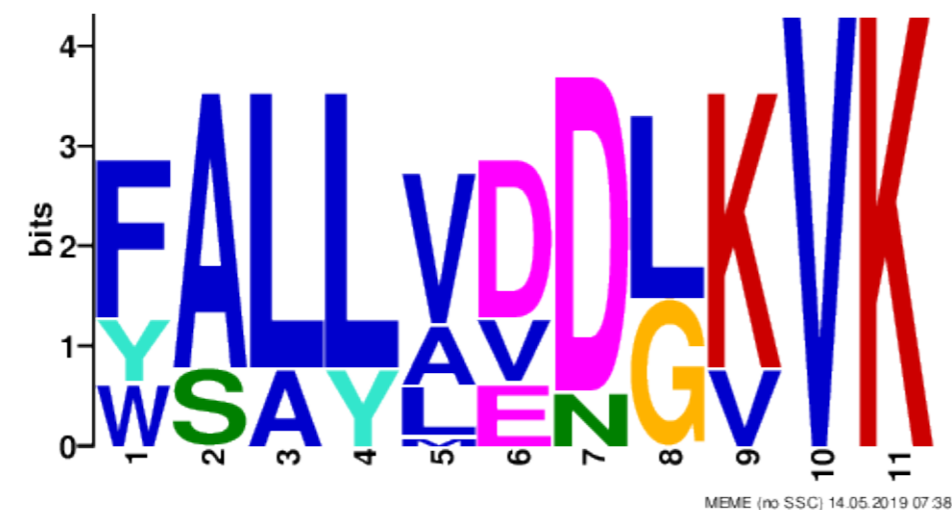

1.2e-110

Motif 9

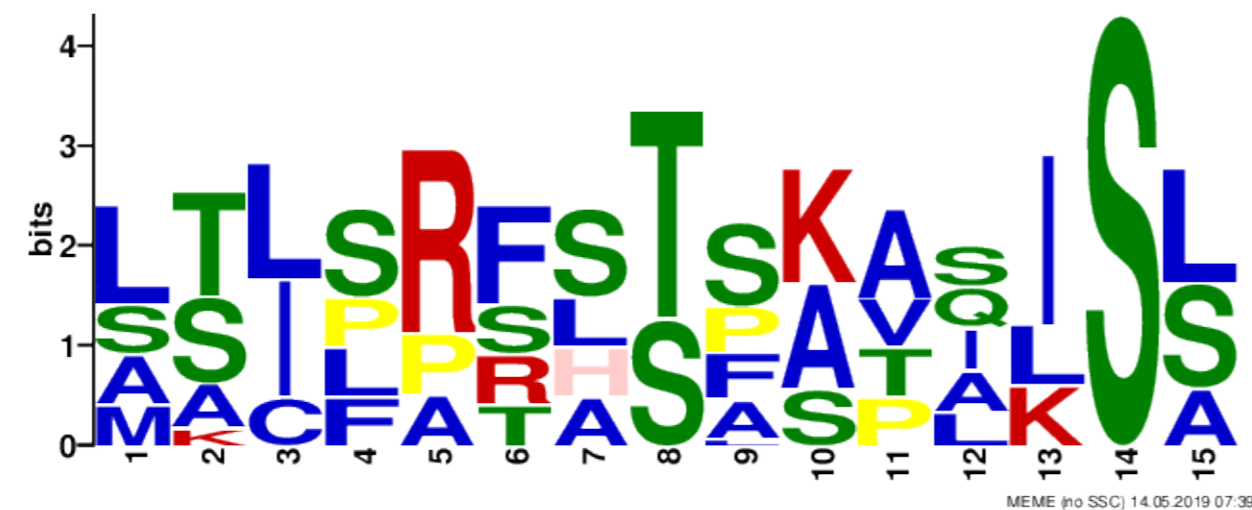

9.9e-092

Motif 10

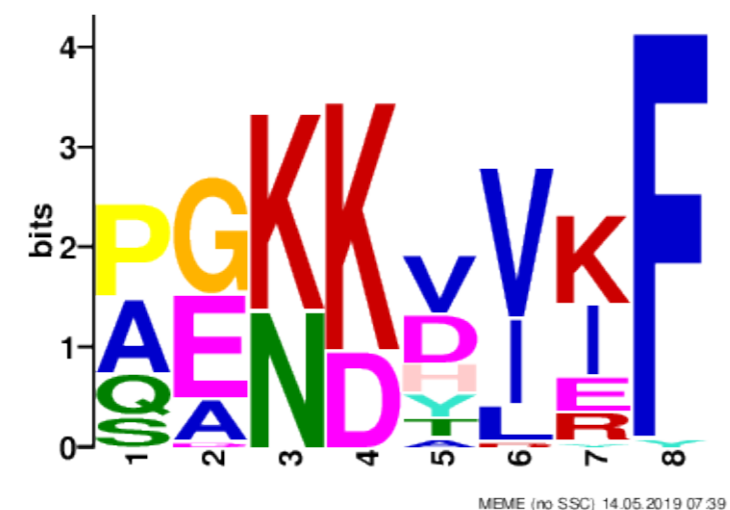

1.5e-071
