# Supplementary material for: Genome-wide identification, evolution, expression, and alternative splicing profiles of peroxiredoxin genes in cotton
Source: PeerJ journal article supplement (doi:10.7717/peerj.10685), 2021-01-18

A

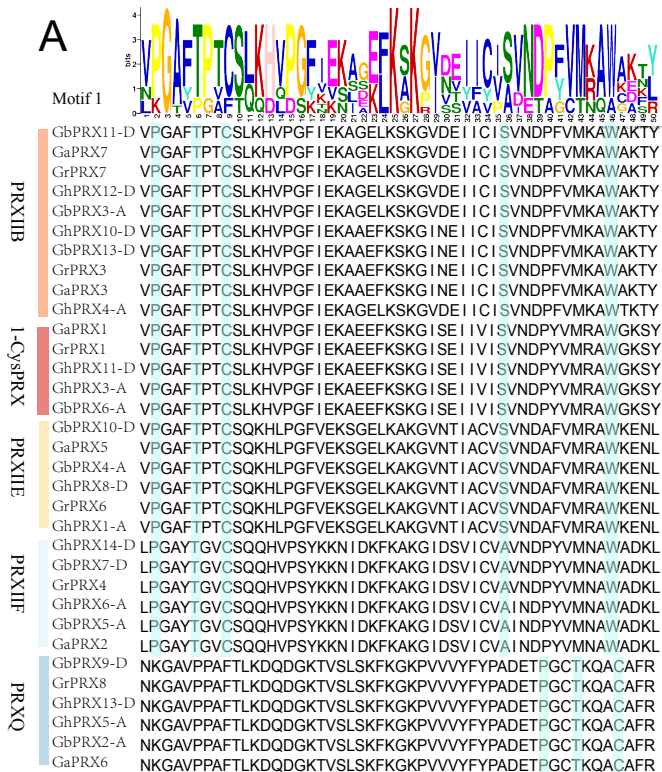

B

Motif 6

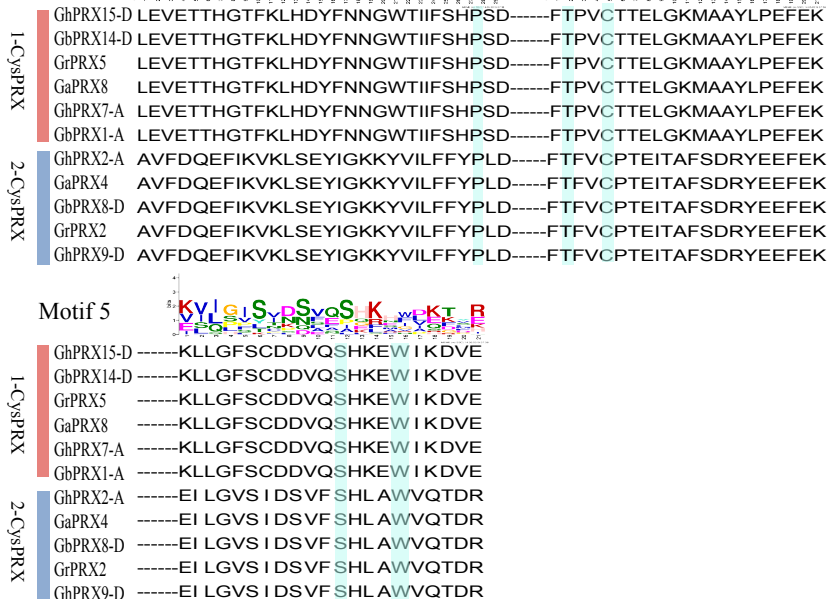

Supplement: Figure_S3.pdf [file Figure_S3.pdf]
