# Supplementary material for: Genome-wide identification, evolution, expression, and alternative splicing profiles of peroxiredoxin genes in cotton
Source: PeerJ journal article supplement (doi:10.7717/peerj.10685), 2021-01-18

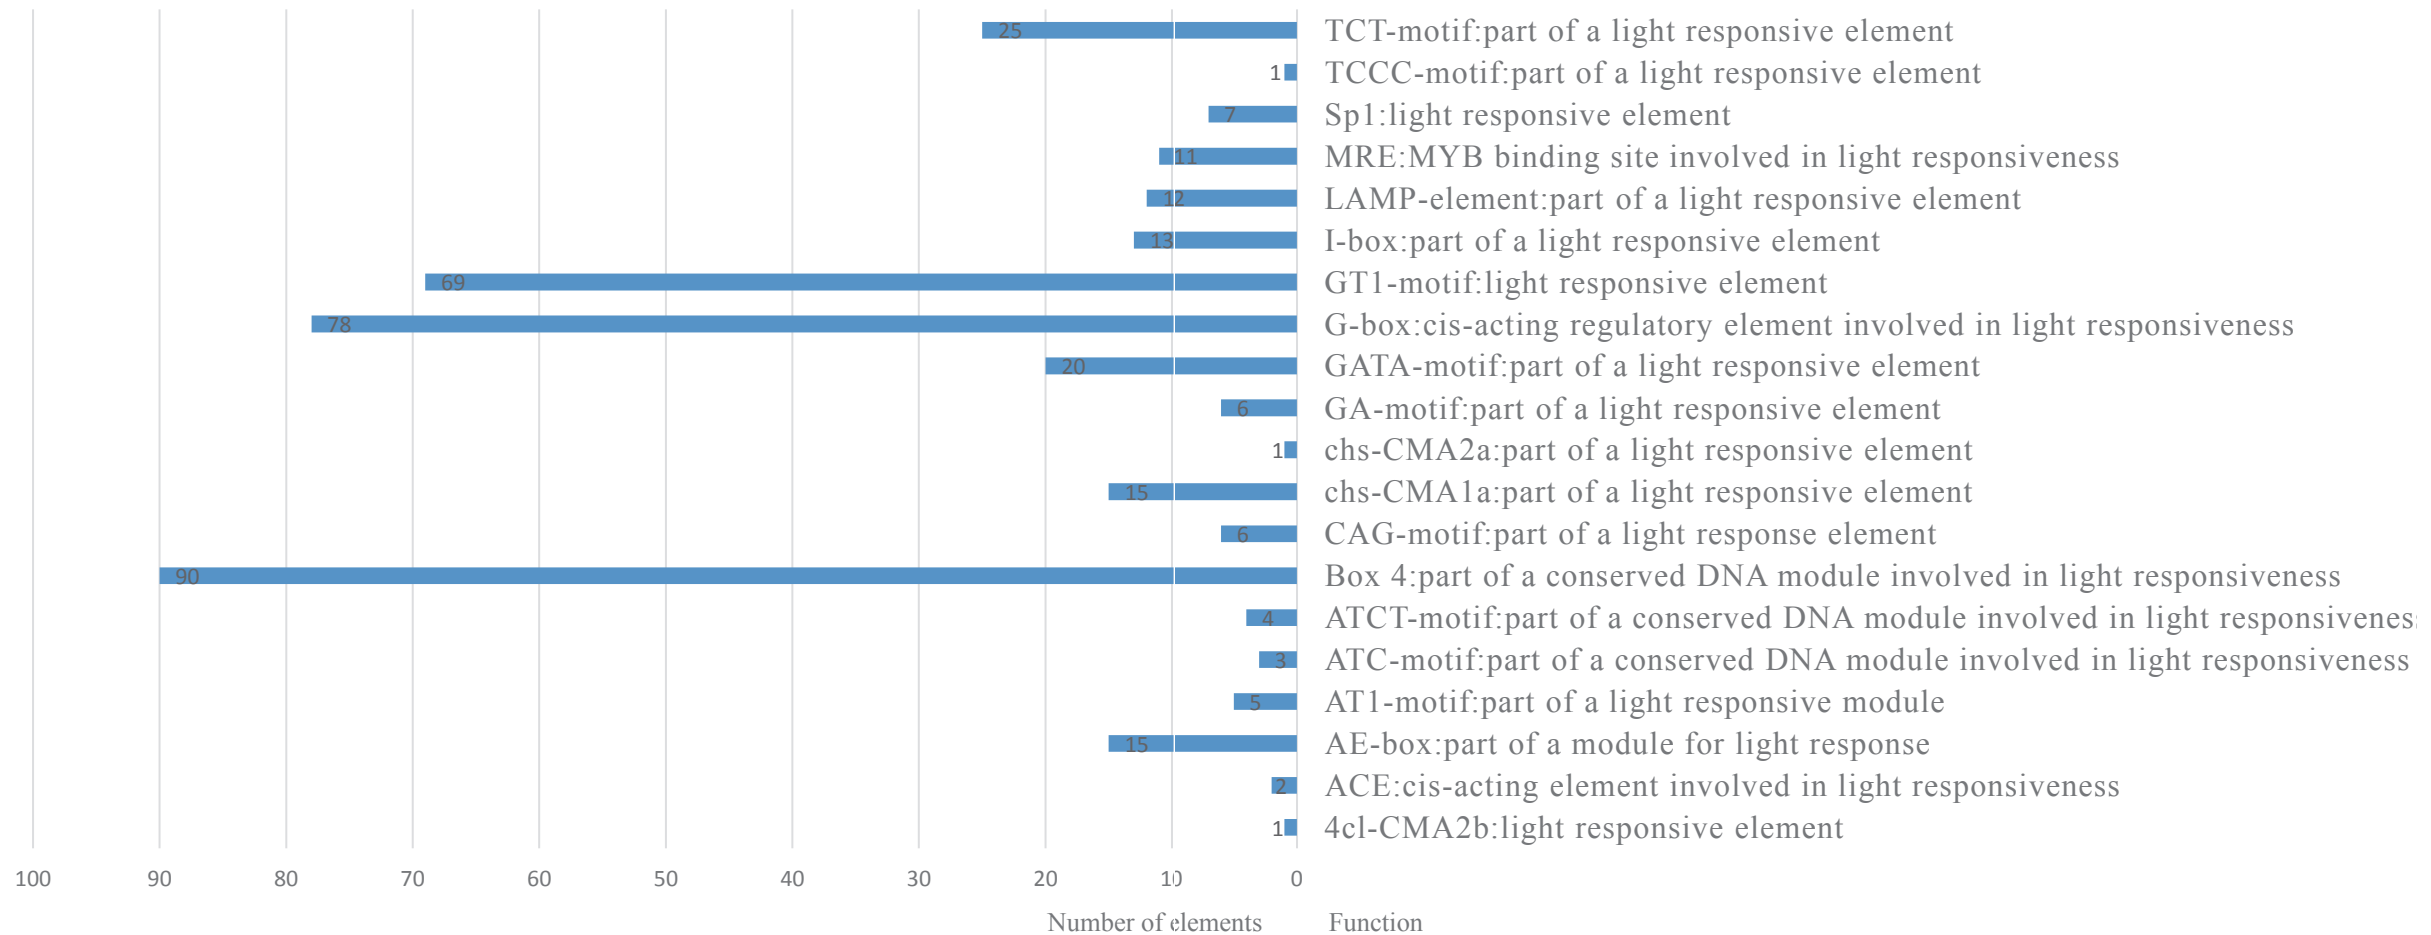

Supplement: Figure_S5.pdf [file Figure_S5.pdf]
