# Supplementary material for: Genome-wide identification, evolution, expression, and alternative splicing profiles of peroxiredoxin genes in cotton
Source: PeerJ. 2021 Jan 18;9:e10685. doi: 10.7717/peerj.10685 (PMC7819121; doi:10.7717/peerj.10685)
Supplement: Table S1 [file peerj-09-10685-s006.xlsx]

## Sheet: Table S1
Table S1 KA, KS and KA/KS calculation and divergent time of the replicated PRXs pairs. Red-marked genes are produced by segmental duplication.
Sequence	Method	Ka	Ks	Ka/Ks	P-Value(Fisher)	Divergence-Time（MYA）
GhPRX15-D&GhPRX7-A	MA	0.0181539	0.0406495	0.446596	0.0424629	1.35498
GhPRX6-A&GhPRX14-D	MA	0.00943882	0.0455925	0.207026	0.00196587	1.51975
GhPRX2-A&GhPRX9-D	MA	0.00941705	0.0232778	0.40455	0.093537	0.775927
GhPRX10-D&GhPRX12-D	MA	0.0692062	0.696082	0.0994225	2.7583e-24	23.2027
GhPRX10-D&GhPRX4-A	MA	0.0718953	0.722187	0.0995522	1.42273e-24	24.0729
GhPRX11-D&GhPRX3-A	MA	0.00865899	0.0232674	0.37215	0.0603559	0.77558
GhPRX4-A&GhPRX12-D	MA	0.00316775	0.0506337	0.0625621	0.00136348	1.68779
GhPRX5-A&GhPRX13-D	MA	0.0107556	0.0735744	0.146187	0.000170123	2.45248
GhPRX8-D&GhPRX1-A	MA	0.00958081	0.0233355	0.410568	0.0900654	0.77785
GbPRX4-A&GbPRX10-D	MA	0.0117399	0.0402233	0.291869	0.0129915	1.34078
GbPRX13-D&GbPRX3-A	MA	0.0682666	0.69902	0.0976604	1.83161e-24	23.3007
GbPRX13-D&GbPRX11-D	MA	0.0692062	0.696082	0.0994225	2.7583e-24	23.2027
GbPRX11-D&GbPRX3-A	MA	4.35462e-05	0.0435462	0.001	0	1.45154
GbPRX9-D&GbPRX2-A	MA	0.0107424	0.0737259	0.145707	0.000169918	2.45753
GbPRX7-D&GbPRX5-A	MA	0.012013	0.04543	0.264429	0.0205969	1.51433
GbPRX14-D&GbPRX1-	MA	0.0181539	0.0406495	0.446596	0.0424629	1.35498
GrPRX3&GrPRX7	MA	0.0617792	0.744299	0.0830031	5.44611e-29	24.81
GaPRX3&GaPRX7	MA	0.0645238	0.719282	0.0897058	9.68692e-28	23.9761
