# Supplementary material for: Genome-wide identification, evolution, expression, and alternative splicing profiles of peroxiredoxin genes in cotton
Source: PeerJ. 2021 Jan 18;9:e10685. doi: 10.7717/peerj.10685 (PMC7819121; doi:10.7717/peerj.10685)
Supplement: Table S2 [file peerj-09-10685-s007.xlsx]

## Sheet: Table S3
Table S2 Details of cis-acting elements in the cotton promoter region
Gene Name	Site Name	sequence	Position	Matrix score	Strand	Organism	function
GaPRX5	ARE	AAACCA	1396	6	+	Zea mays	cis-acting regulatory element essential for the anaerobic induction
GaPRX5	WUN-motif	CCATTTCAA	83	9	+	Nicotiana glutinosa	Wound responsive element (WUN-motif) in opposite strand
GaPRX5	CGTCA-motif	CGTCA	1437	5	+	Hordeum vulgare	cis-acting regulatory element involved in the MeJA-responsiveness
GaPRX5	ERE	ATTTTAAA	901	8	-	Nicotiana glutinos	Ethylene-responsive element (ERE) in opposite strand
GaPRX5	P-box	CCTTTTG	1250	7	-	Oryza sativa	gibberellin-responsive element
GaPRX5	TGACG-motif	TGACG	1437	5	-	Hordeum vulgare	cis-acting regulatory element involved in the MeJA-responsiveness
GaPRX5	AACA_motif	TAACAAACTCCA	1331	11	+	Oryza sativa	involved in endosperm-specific negative expression
GaPRX5	MYB	TAACCA	1246	6	+	Arabidopsis thaliana	Myb protein binding sequence
GaPRX5	MYB	CAACCA	1302	6	-	Arabidopsis thaliana	Myb protein binding sequence
GaPRX5	AT1-motif	AATTATTTTTTATT	459	13	-	Solanum tuberosum	part of a light responsive module
GaPRX5	Box 4	ATTAAT	186	6	+	Petroselinum crispum	part of a conserved DNA module involved in light responsiveness
GaPRX5	GA-motif	ATAGATAA	1295	8	-	Arabidopsis thaliana	part of a light responsive element
GaPRX5	GT1-motif	GGTTAA	1245	6	-	Arabidopsis thaliana	light responsive element
GaPRX5	I-box	TGATAATGT	1266	9	-	Solanum tuberosum	part of a light responsive element
GaPRX5	MRE	AACCTAA	1089	7	+	Petroselinum crispum	MYB binding site involved in light responsiveness
GaPRX5	MRE	AACCTAA	1403	7	+	Petroselinum crispum	MYB binding site involved in light responsiveness
GaPRX5	TCT-motif	TCTTAC	357	6	+	Arabidopsis thaliana	part of a light responsive element
GaPRX5	TCT-motif	TCTTAC	887	6	+	Arabidopsis thaliana	part of a light responsive element
GaPRX4	MBS	CAACTG	1400	6	+	Arabidopsis thaliana	MYB binding site involved in drought-inducibility
GaPRX4	WRE3	CCACCT	822	6	+	Pisum sativum	wound inducibility (third region)
GaPRX4	WUN-motif	CAATTACAT	993	9	+	Nicotiana glutinosa	Wound responsive element (WUN-motif) in opposite strand
GaPRX4	ABRE	ACGTG	73	5	+	Arabidopsis thaliana	cis-acting element involved in the abscisic acid responsiveness
GaPRX4	CGTCA-motif	CGTCA	953	5	-	Hordeum vulgare	cis-acting regulatory element involved in the MeJA-responsiveness
GaPRX4	P-box	CCTTTTG	65	7	+	Oryza sativa	gibberellin-responsive element
GaPRX4	TGACG-motif	TGACG	953	5	+	Hordeum vulgare	cis-acting regulatory element involved in the MeJA-responsiveness
GaPRX4	Myb	CAACTG	1400	6	+	Arabidopsis thaliana	Myb protein binding sequence
GaPRX4	MYB	TAACCA	784	6	-	Arabidopsis thaliana	Myb protein binding sequence
GaPRX4	MYB	TAACCA	819	6	+	Arabidopsis thaliana	Myb protein binding sequence
GaPRX4	AE-box	AGAAACTT	675	8	+	Arabidopsis thaliana	part of a module for light response
GaPRX4	Box 4	ATTAAT	845	6	-	Petroselinum crispum	part of a conserved DNA module involved in light responsiveness
GaPRX4	Box 4	ATTAAT	1013	6	-	Petroselinum crispum	part of a conserved DNA module involved in light responsiveness
GaPRX4	chs-CMA1a	TTACTTAA	1149	8	+	Daucus carota	part of a light responsive element
GaPRX4	G-box	TAACACGTAG	71	9	-	Brassica oleracea	cis-acting regulatory element involved in light responsiveness
GaPRX4	G-box	TACGTG	72	6	+	Arabidopsis thaliana	cis-acting regulatory element involved in light responsiveness
GaPRX4	GT1-motif	GGTTAA	785	6	+	Arabidopsis thaliana	light responsive element
GaPRX4	GT1-motif	GGTTAAT	817	7	-	Avena sativa	light responsive element
GaPRX4	GT1-motif	GGTTAA	818	6	-	Arabidopsis thaliana	light responsive element
GaPRX4	I-box	gGATAAGGTG	13	9	+	Zea mays	part of a light responsive element
GaPRX4	TCT-motif	TCTTAC	520	6	+	Arabidopsis thaliana	part of a light responsive element
GaPRX4	TCT-motif	TCTTAC	689	6	+	Arabidopsis thaliana	part of a light responsive element
GaPRX3	ARE	AAACCA	950	6	-	Zea mays	cis-acting regulatory element essential for the anaerobic induction
GaPRX3	MBS	CAACTG	638	6	+	Arabidopsis thaliana	MYB binding site involved in drought-inducibility
GaPRX3	MBS	CAACTG	1453	6	+	Arabidopsis thaliana	MYB binding site involved in drought-inducibility
GaPRX3	STRE	AGGGG	103	5	-	Arabidopsis thaliana	activation by heat shock, osmotic stress, low pH, nutrient starvation
GaPRX3	WRE3	CCACCT	796	6	-	Pisum sativum	wound inducibility (third region)
GaPRX3	WUN-motif	AAATTACT	493	8	+	Nicotiana glutinosa	Wound responsive element (WUN-motif) in opposite strand
GaPRX3	WUN-motif	AAATTTCCT	208	9	+	Brassica oleracea	wound-responsive element
GaPRX3	ERE	ATTTCATA	432	8	-	Nicotiana glutinos	Ethylene-responsive element (ERE) in opposite strand
GaPRX3	P-box	CCTTTTG	1328	7	-	Oryza sativa	gibberellin-responsive element
GaPRX3	AT-rich element	ATAGAAATCAA	220	10	-	Glycine max	binding site of AT-rich DNA binding protein (ATBP-1)
GaPRX3	Myb	CAACTG	638	6	+	Arabidopsis thaliana	Myb protein binding sequence
GaPRX3	Myb	CAACTG	1453	6	+	Arabidopsis thaliana	Myb protein binding sequence
GaPRX3	MYB	CAACCA	469	6	-	Arabidopsis thaliana	Myb protein binding sequence
GaPRX3	MYB	TAACCA	589	6	+	Arabidopsis thaliana	Myb protein binding sequence
GaPRX3	MYB	CAACCA	1030	6	-	Arabidopsis thaliana	Myb protein binding sequence
GaPRX3	MYB	CAACAG	1049	6	-	Arabidopsis thaliana	Myb protein binding sequence
GaPRX3	MYB	CAACCA	1071	6	-	Arabidopsis thaliana	Myb protein binding sequence
GaPRX3	MYB	CAACCA	1319	6	+	Arabidopsis thaliana	Myb protein binding sequence
GaPRX3	AE-box	AGAAACTT	1091	8	+	Arabidopsis thaliana	part of a module for light response
GaPRX3	Box 4	ATTAAT	417	6	+	Petroselinum crispum	part of a conserved DNA module involved in light responsiveness
GaPRX3	GATA-motif	GATAGGA	506	7	+	Arabidopsis thaliana	part of a light responsive element
GaPRX3	GATA-motif	AAGATAAGATT	804	10	+	Arabidopsis thaliana	part of a light responsive element
GaPRX3	GATA-motif	GATAGGA	821	7	+	Arabidopsis thaliana	part of a light responsive element
GaPRX3	LAMP-element	CTTTATCA	343	8	+	Pisum sativum	part of a light responsive element
GaPRX1	ARE	AAACCA	365	6	+	Zea mays	cis-acting regulatory element essential for the anaerobic induction
GaPRX1	ARE	AAACCA	532	6	-	Zea mays	cis-acting regulatory element essential for the anaerobic induction
GaPRX1	ARE	AAACCA	915	6	+	Zea mays	cis-acting regulatory element essential for the anaerobic induction
GaPRX1	ARE	AAACCA	1486	6	+	Zea mays	cis-acting regulatory element essential for the anaerobic induction
GaPRX1	WRE3	CCACCT	890	6	-	Pisum sativum	wound inducibility (third region)
GaPRX1	ABRE	GCAACGTGTC	838	9	-	Hordeum vulgare	cis-acting element involved in the abscisic acid responsiveness
GaPRX1	ABRE	ACGTG	840	5	-	Arabidopsis thaliana	cis-acting element involved in the abscisic acid responsiveness
GaPRX1	AuxRR-core	GGTCCAT	121	7	-	Nicotiana tabacum	cis-acting regulatory element involved in auxin responsiveness
GaPRX1	AuxRR-core	GGTCCAT	989	7	-	Nicotiana tabacum	cis-acting regulatory element involved in auxin responsiveness
GaPRX1	CGTCA-motif	CGTCA	798	5	+	Hordeum vulgare	cis-acting regulatory element involved in the MeJA-responsiveness
GaPRX1	TCA-element	CCATCTTTTT	443	9	+	Nicotiana tabacum	cis-acting element involved in salicylic acid responsiveness
GaPRX1	TGACG-motif	TGACG	798	5	-	Hordeum vulgare	cis-acting regulatory element involved in the MeJA-responsiveness
GaPRX1	HD-Zip 1	CAAT(A/T)ATTG	938	8.5	-	Arabidopsis thaliana	element involved in differentiation of the palisade mesophyll cells
GaPRX1	MYB	CAACAG	293	6	-	Arabidopsis thaliana	Myb protein binding sequence
GaPRX1	O2-site	GATGACATGG	972	9	-	Zea mays	cis-acting regulatory element involved in zein metabolism regulation
GaPRX1	GATA-motif	GATAGGA	682	7	+	Arabidopsis thaliana	part of a light responsive element
GaPRX1	G-Box	CACGTT	840	6	+	Pisum sativum	cis-acting regulatory element involved in light responsiveness
GaPRX1	GT1-motif	GGTTAA	195	6	+	Arabidopsis thaliana	light responsive element
GaPRX1	GT1-motif	GGTTAA	1431	6	-	Arabidopsis thaliana	light responsive element
GaPRX1	I-box	GTATAAGGCC	1326	9	-	Larix laricina	part of a light responsive element
GaPRX7	MBS	CAACTG	971	6	-	Arabidopsis thaliana	MYB binding site involved in drought-inducibility
GaPRX7	STRE	AGGGG	1406	5	-	Arabidopsis thaliana	activation by heat shock, osmotic stress, low pH, nutrient starvation
GaPRX7	WUN-motif	CCATTTCAA	1394	9	+	Nicotiana glutinosa	Wound responsive element (WUN-motif) in opposite strand
GaPRX7	ABRE	ACGTG	59	5	+	Arabidopsis thaliana	cis-acting element involved in the abscisic acid responsiveness
GaPRX7	ABRE	ACGTG	612	5	-	Arabidopsis thaliana	cis-acting element involved in the abscisic acid responsiveness
GaPRX7	ABRE	ACGTG	1241	5	-	Arabidopsis thaliana	cis-acting element involved in the abscisic acid responsiveness
GaPRX7	CGTCA-motif	CGTCA	600	5	+	Hordeum vulgare	cis-acting regulatory element involved in the MeJA-responsiveness
GaPRX7	ERE	ATTTTAAA	364	8	+	Nicotiana glutinos	Ethylene-responsive element (ERE) in opposite strand
GaPRX7	ERE	ATTTTAAA	366	8	-	Nicotiana glutinos	Ethylene-responsive element (ERE) in opposite strand
GaPRX7	ERE	ATTTTAAA	626	8	+	Nicotiana glutinos	Ethylene-responsive element (ERE) in opposite strand
GaPRX7	TATC-box	TATCCCA	843	7	+	Oryza sativa	cis-acting element involved in gibberellin-responsiveness
GaPRX7	TGACG-motif	TGACG	600	5	-	Hordeum vulgare	cis-acting regulatory element involved in the MeJA-responsiveness
GaPRX7	TGA-element	AACGAC	103	6	-	Brassica oleracea	auxin-responsive element
GaPRX7	GCN4_motif	TGAGTCA	473	7	-	Oryza sativa	cis-regulatory element involved in endosperm expression
GaPRX7	Myb	CAACTG	971	6	-	Arabidopsis thaliana	Myb protein binding sequence
GaPRX7	Box 4	ATTAAT	307	6	+	Petroselinum crispum	part of a conserved DNA module involved in light responsiveness
GaPRX7	Box 4	ATTAAT	769	6	-	Petroselinum crispum	part of a conserved DNA module involved in light responsiveness
GaPRX7	Box 4	ATTAAT	1010	6	-	Petroselinum crispum	part of a conserved DNA module involved in light responsiveness
GaPRX7	G-Box	CACGTT	58	6	-	Pisum sativum	cis-acting regulatory element involved in light responsiveness
GaPRX7	G-Box	CACGTT	612	6	+	Pisum sativum	cis-acting regulatory element involved in light responsiveness
GaPRX7	G-Box	CACGTT	1241	6	+	Pisum sativum	cis-acting regulatory element involved in light responsiveness
GaPRX7	G-box	TAAACGTG	612	8	-	Brassica oleracea	cis-acting regulatory element involved in light responsiveness
GaPRX7	GT1-motif	GGTTAAT	418	7	+	Avena sativa	light responsive element
GaPRX7	Sp1	GGGCGG	208	6	-	Oryza sativa	light responsive element
GaPRX7	TCT-motif	TCTTAC	1427	6	+	Arabidopsis thaliana	part of a light responsive element
GaPRX6	ARE	AAACCA	851	6	+	Zea mays	cis-acting regulatory element essential for the anaerobic induction
GaPRX6	ARE	AAACCA	1192	6	+	Zea mays	cis-acting regulatory element essential for the anaerobic induction
GaPRX6	LTR	CCGAAA	407	6	+	Hordeum vulgare	cis-acting element involved in low-temperature responsiveness
GaPRX6	STRE	AGGGG	309	5	+	Arabidopsis thaliana	activation by heat shock, osmotic stress, low pH, nutrient starvation
GaPRX6	STRE	AGGGG	331	5	+	Arabidopsis thaliana	activation by heat shock, osmotic stress, low pH, nutrient starvation
GaPRX6	STRE	AGGGG	1335	5	+	Arabidopsis thaliana	activation by heat shock, osmotic stress, low pH, nutrient starvation
GaPRX6	STRE	AGGGG	1394	5	-	Arabidopsis thaliana	activation by heat shock, osmotic stress, low pH, nutrient starvation
GaPRX6	WUN-motif	CCATTTCAA	196	9	-	Nicotiana glutinosa	Wound responsive element (WUN-motif) in opposite strand
GaPRX6	ABRE	ACGTG	108	5	-	Arabidopsis thaliana	cis-acting element involved in the abscisic acid responsiveness
GaPRX6	ABRE	CGTACGTGCA	1177	9	-	Hordeum vulgare	cis-acting element involved in the abscisic acid responsiveness
GaPRX6	ABRE	ACGTG	1179	5	-	Arabidopsis thaliana	cis-acting element involved in the abscisic acid responsiveness
GaPRX6	TCA-element	CCATCTTTTT	422	9	+	Nicotiana tabacum	cis-acting element involved in salicylic acid responsiveness
GaPRX6	GCN4_motif	TGAGTCA	958	7	+	Oryza sativa	cis-regulatory element involved in endosperm expression
GaPRX6	MBSI	TTTTTACGGTTA	1151	11	-	Petunia hybrida	MYB binding site involved in flavonoid biosynthetic genes regulation
GaPRX6	MYB	CAACCA	855	6	+	Arabidopsis thaliana	Myb protein binding sequence
GaPRX6	MYB	TAACCA	1408	6	+	Arabidopsis thaliana	Myb protein binding sequence
GaPRX6	chs-CMA1a	TTACTTAA	172	8	-	Daucus carota	part of a light responsive element
GaPRX6	G-box	CACGTC	108	6	+	Zea mays	cis-acting regulatory element involved in light responsiveness
GaPRX6	G-box	TACGTG	1179	6	-	Arabidopsis thaliana	cis-acting regulatory element involved in light responsiveness
GaPRX6	GT1-motif	GGTTAA	185	6	+	Arabidopsis thaliana	light responsive element
GaPRX6	GT1-motif	GGTTAA	1150	6	-	Arabidopsis thaliana	light responsive element
GaPRX6	LAMP-element	CTTTATCA	757	8	+	Pisum sativum	part of a light responsive element
GaPRX8	ARE	AAACCA	724	6	+	Zea mays	cis-acting regulatory element essential for the anaerobic induction
GaPRX8	MBS	CAACTG	1464	6	-	Arabidopsis thaliana	MYB binding site involved in drought-inducibility
GaPRX8	WUN-motif	AAATTTCCT	1103	9	-	Brassica oleracea	wound-responsive element
GaPRX8	ABRE	ACGTG	1340	5	+	Arabidopsis thaliana	cis-acting element involved in the abscisic acid responsiveness
GaPRX8	ABRE	ACGTG	1392	5	-	Arabidopsis thaliana	cis-acting element involved in the abscisic acid responsiveness
GaPRX8	AuxRR-core	GGTCCAT	1132	7	+	Nicotiana tabacum	cis-acting regulatory element involved in auxin responsiveness
GaPRX8	ERE	ATTTCATA	6	8	+	Nicotiana glutinos	Ethylene-responsive element (ERE) in opposite strand
GaPRX8	ERE	ATTTTAAA	406	8	+	Nicotiana glutinos	Ethylene-responsive element (ERE) in opposite strand
GaPRX8	ERE	ATTTTAAA	629	8	-	Nicotiana glutinos	Ethylene-responsive element (ERE) in opposite strand
GaPRX8	ERE	ATTTTAAA	1030	8	+	Nicotiana glutinos	Ethylene-responsive element (ERE) in opposite strand
GaPRX8	ERE	ATTTTAAA	1032	8	-	Nicotiana glutinos	Ethylene-responsive element (ERE) in opposite strand
GaPRX8	Myb	CAACTG	1464	6	-	Arabidopsis thaliana	Myb protein binding sequence
GaPRX8	MYB	TAACCA	129	6	-	Arabidopsis thaliana	Myb protein binding sequence
GaPRX8	MYB	CAACAG	1461	6	+	Arabidopsis thaliana	Myb protein binding sequence
GaPRX8	Box 4	ATTAAT	687	6	+	Petroselinum crispum	part of a conserved DNA module involved in light responsiveness
GaPRX8	Box 4	ATTAAT	838	6	-	Petroselinum crispum	part of a conserved DNA module involved in light responsiveness
GaPRX8	Box 4	ATTAAT	1019	6	-	Petroselinum crispum	part of a conserved DNA module involved in light responsiveness
GaPRX8	Box 4	ATTAAT	1038	6	-	Petroselinum crispum	part of a conserved DNA module involved in light responsiveness
GaPRX8	Box 4	ATTAAT	1055	6	-	Petroselinum crispum	part of a conserved DNA module involved in light responsiveness
GaPRX8	CAG-motif	GAAAGGCAGAC	1331	10	+	Arabidopsis thaliana	part of a light response element
GaPRX8	G-box	CAGACGTGGCA	1337	10	+	Nicotiana plumbaginifolia	cis-acting regulatory element involved in light responsiveness
GaPRX8	G-box	CACGTC	1339	6	-	Zea mays	cis-acting regulatory element involved in light responsiveness
GaPRX8	G-box	CCACGTAA	1391	8	+	Brassica napus	cis-acting regulatory element involved in light responsiveness
GaPRX8	G-box	TACGTG	1392	6	-	Arabidopsis thaliana	cis-acting regulatory element involved in light responsiveness
GaPRX8	GT1-motif	GGTTAA	130	6	+	Arabidopsis thaliana	light responsive element
GaPRX8	GT1-motif	GGTTAA	1236	6	-	Arabidopsis thaliana	light responsive element
GaPRX2	ARE	AAACCA	400	6	-	Zea mays	cis-acting regulatory element essential for the anaerobic induction
GaPRX2	STRE	AGGGG	305	5	-	Arabidopsis thaliana	activation by heat shock, osmotic stress, low pH, nutrient starvation
GaPRX2	WRE3	CCACCT	110	6	-	Pisum sativum	wound inducibility (third region)
GaPRX2	WRE3	CCACCT	512	6	-	Pisum sativum	wound inducibility (third region)
GaPRX2	ERE	ATTTTAAA	814	8	-	Nicotiana glutinos	Ethylene-responsive element (ERE) in opposite strand
GaPRX2	ERE	ATTTCATA	1043	8	-	Nicotiana glutinos	Ethylene-responsive element (ERE) in opposite strand
GaPRX2	Myb	TAACTG	1377	6	-	Arabidopsis thaliana	Myb protein binding sequence
GaPRX2	MYB	TAACCA	1367	6	-	Arabidopsis thaliana	Myb protein binding sequence
GaPRX2	MYB	CAACAG	1480	6	+	Arabidopsis thaliana	Myb protein binding sequence
GaPRX2	AE-box	AGAAACAA	1433	8	+	Arabidopsis thaliana	part of a module for light response
GaPRX2	Box 4	ATTAAT	88	6	+	Petroselinum crispum	part of a conserved DNA module involved in light responsiveness
GaPRX2	Box 4	ATTAAT	756	6	-	Petroselinum crispum	part of a conserved DNA module involved in light responsiveness
GaPRX2	Box 4	ATTAAT	1194	6	-	Petroselinum crispum	part of a conserved DNA module involved in light responsiveness
GaPRX2	chs-CMA1a	TTACTTAA	928	8	-	Daucus carota	part of a light responsive element
GaPRX2	GT1-motif	GGTTAA	1368	6	+	Arabidopsis thaliana	light responsive element
GaPRX2	Sp1	GGGCGG	1386	6	-	Oryza sativa	light responsive element
GaPRX2	TCT-motif	TCTTAC	14	6	-	Arabidopsis thaliana	part of a light responsive element
GaPRX2	TCT-motif	TCTTAC	195	6	-	Arabidopsis thaliana	part of a light responsive element
GbPRX4-A	ARE	AAACCA	1396	6	+	Zea mays	cis-acting regulatory element essential for the anaerobic induction
GbPRX4-A	MYC	CATGTG	991	6	-	Arabidopsis thaliana	necessary for induction in dehydrated plants
GbPRX4-A	MYC	CAATTG	1175	6	-	Arabidopsis thaliana	necessary for induction in dehydrated plants
GbPRX4-A	WUN-motif	CCATTTCAA	80	9	+	Nicotiana glutinosa	wound-responsive element
GbPRX4-A	CGTCA-motif	CGTCA	1437	5	+	Hordeum vulgare	cis-acting regulatory element involved in the MeJA-responsiveness
GbPRX4-A	ERE	ATTTTAAA	901	8	-	Nicotiana glutinos	Ethylene-responsive element (ERE) in opposite strand
GbPRX4-A	P-box	CCTTTTG	1250	7	-	Oryza sativa	gibberellin-responsive element
GbPRX4-A	TGACG-motif	TGACG	1437	5	-	Hordeum vulgare	cis-acting regulatory element involved in the MeJA-responsiveness
GbPRX4-A	AACA_motif	TAACAAACTCCA	1331	11	+	Oryza sativa	involved in endosperm-specific negative expression
GbPRX4-A	MYB	TAACCA	1246	6	+	Arabidopsis thaliana	Myb protein binding sequence
GbPRX4-A	MYB	CAACCA	1302	6	-	Arabidopsis thaliana	Myb protein binding sequence
GbPRX4-A	AT1-motif	AATTATTTTTTATT	456	13	-	Solanum tuberosum	part of a light responsive module
GbPRX4-A	GA-motif	ATAGATAA	1295	8	-	Arabidopsis thaliana	part of a light responsive element
GbPRX4-A	GT1-motif	GGTTAA	1245	6	-	Arabidopsis thaliana	light responsive element
GbPRX4-A	I-box	TGATAATGT	1266	9	-	Solanum tuberosum	part of a light responsive element
GbPRX4-A	MRE	AACCTAA	1403	7	+	Petroselinum crispum	MYB binding site involved in light responsiveness
GbPRX4-A	TCT-motif	TCTTAC	887	6	+	Arabidopsis thaliana	part of a light responsive element
GbPRX3-A	MBS	CAACTG	1128	6	-	Arabidopsis thaliana	MYB binding site involved in drought-inducibility
GbPRX3-A	MYC	CATTTG	957	6	-	Arabidopsis thaliana	necessary for induction in dehydrated plants
GbPRX3-A	ABRE	ACGTG	219	5	+	Arabidopsis thaliana	cis-acting element involved in the abscisic acid responsiveness
GbPRX3-A	ABRE	ACGTG	770	5	-	Arabidopsis thaliana	cis-acting element involved in the abscisic acid responsiveness
GbPRX3-A	ABRE	ACGTG	1398	5	-	Arabidopsis thaliana	cis-acting element involved in the abscisic acid responsiveness
GbPRX3-A	CGTCA-motif	CGTCA	758	5	+	Hordeum vulgare	cis-acting regulatory element involved in the MeJA-responsiveness
GbPRX3-A	ERE	ATTTTAAA	524	8	+	Nicotiana glutinos	Ethylene-responsive element (ERE) in opposite strand
GbPRX3-A	ERE	ATTTTAAA	526	8	-	Nicotiana glutinos	Ethylene-responsive element (ERE) in opposite strand
GbPRX3-A	ERE	ATTTTAAA	784	8	+	Nicotiana glutinos	Ethylene-responsive element (ERE) in opposite strand
GbPRX3-A	TGACG-motif	TGACG	758	5	-	Hordeum vulgare	cis-acting regulatory element involved in the MeJA-responsiveness
GbPRX3-A	TGA-element	AACGAC	263	6	-	Brassica oleracea	auxin-responsive element
GbPRX3-A	GCN4_motif	TGAGTCA	633	7	-	Oryza sativa	cis-regulatory element involved in endosperm expression
GbPRX3-A	Myb	CAACTG	1128	6	-	Arabidopsis thaliana	Myb protein binding sequence
GbPRX3-A	MYB	TAACCA	577	6	-	Arabidopsis thaliana	Myb protein binding sequence
GbPRX3-A	Box 4	ATTAAT	467	6	+	Petroselinum crispum	part of a conserved DNA module involved in light responsiveness
GbPRX3-A	Box 4	ATTAAT	927	6	-	Petroselinum crispum	part of a conserved DNA module involved in light responsiveness
GbPRX3-A	Box 4	ATTAAT	1167	6	-	Petroselinum crispum	part of a conserved DNA module involved in light responsiveness
GbPRX3-A	G-Box	CACGTT	218	6	-	Pisum sativum	cis-acting regulatory element involved in light responsiveness
GbPRX3-A	G-Box	CACGTT	770	6	+	Pisum sativum	cis-acting regulatory element involved in light responsiveness
GbPRX3-A	G-Box	CACGTT	1398	6	+	Pisum sativum	cis-acting regulatory element involved in light responsiveness
GbPRX3-A	G-box	TAAACGTG	770	8	-	Brassica oleracea	cis-acting regulatory element involved in light responsiveness
GbPRX3-A	GT1-motif	GGTTAAT	578	7	+	Avena sativa	light responsive element
GbPRX3-A	Sp1	GGGCGG	368	6	-	Oryza sativa	light responsive element
GbPRX2-A	ARE	AAACCA	1058	6	+	Zea mays	cis-acting regulatory element essential for the anaerobic induction
GbPRX2-A	ARE	AAACCA	1399	6	+	Zea mays	cis-acting regulatory element essential for the anaerobic induction
GbPRX2-A	LTR	CCGAAA	613	6	+	Hordeum vulgare	cis-acting element involved in low-temperature responsiveness
GbPRX2-A	MYC	CATTTG	39	6	+	Arabidopsis thaliana	necessary for induction in dehydrated plants
GbPRX2-A	MYC	CAATTG	607	6	+	Arabidopsis thaliana	necessary for induction in dehydrated plants
GbPRX2-A	MYC	CATTTG	1104	6	+	Arabidopsis thaliana	necessary for induction in dehydrated plants
GbPRX2-A	MYC	CAATTG	1284	6	-	Arabidopsis thaliana	necessary for induction in dehydrated plants
GbPRX2-A	STRE	AGGGG	515	5	+	Arabidopsis thaliana	activation by heat shock, osmotic stress, low pH, nutrient starvation
GbPRX2-A	STRE	AGGGG	537	5	+	Arabidopsis thaliana	activation by heat shock, osmotic stress, low pH, nutrient starvation
GbPRX2-A	WUN-motif	CCATTTCAA	402	9	-	Nicotiana glutinosa	wound-responsive element
GbPRX2-A	ABRE	ACGTG	314	5	-	Arabidopsis thaliana	cis-acting element involved in the abscisic acid responsiveness
GbPRX2-A	ABRE	CGTACGTGCA	1384	9	-	Hordeum vulgare	cis-acting element involved in the abscisic acid responsiveness
GbPRX2-A	ABRE	ACGTG	1386	5	-	Arabidopsis thaliana	cis-acting element involved in the abscisic acid responsiveness
GbPRX2-A	ERE	ATTTTAAA	133	8	+	Nicotiana glutinos	Ethylene-responsive element (ERE) in opposite strand
GbPRX2-A	TCA-element	CCATCTTTTT	628	9	+	Nicotiana tabacum	cis-acting element involved in salicylic acid responsiveness
GbPRX2-A	GCN4_motif	TGAGTCA	1165	7	+	Oryza sativa	cis-regulatory element involved in endosperm expression
GbPRX2-A	MBSI	TTTTTACGGTTA	1358	11	-	Petunia hybrida	MYB binding site involved in flavonoid biosynthetic genes regulation
GbPRX2-A	MYB	CAACCA	1062	6	+	Arabidopsis thaliana	Myb protein binding sequence
GbPRX2-A	Box 4	ATTAAT	816	6	-	Petroselinum crispum	part of a conserved DNA module involved in light responsiveness
GbPRX2-A	chs-CMA1a	TTACTTAA	378	8	-	Daucus carota	part of a light responsive element
GbPRX2-A	G-box	CACGTC	314	6	+	Zea mays	cis-acting regulatory element involved in light responsiveness
GbPRX2-A	G-box	TACGTG	1386	6	-	Arabidopsis thaliana	cis-acting regulatory element involved in light responsiveness
GbPRX2-A	GT1-motif	GGTTAAT	186	7	+	Avena sativa	light responsive element
GbPRX2-A	GT1-motif	GGTTAA	391	6	+	Arabidopsis thaliana	light responsive element
GbPRX2-A	GT1-motif	GGTTAA	1357	6	-	Arabidopsis thaliana	light responsive element
GbPRX2-A	LAMP-element	CTTTATCA	964	8	+	Pisum sativum	part of a light responsive element
GbPRX5-A	ARE	AAACCA	580	6	-	Zea mays	cis-acting regulatory element essential for the anaerobic induction
GbPRX5-A	Myc	TCTCTTA	1335	7	+	Arabidopsis thaliana	necessary for induction in dehydrated plants
GbPRX5-A	MYC	CAATTG	504	6	+	Arabidopsis thaliana	necessary for induction in dehydrated plants
GbPRX5-A	MYC	CATTTG	1077	6	-	Arabidopsis thaliana	necessary for induction in dehydrated plants
GbPRX5-A	STRE	AGGGG	132	5	+	Arabidopsis thaliana	activation by heat shock, osmotic stress, low pH, nutrient starvation
GbPRX5-A	STRE	AGGGG	485	5	-	Arabidopsis thaliana	activation by heat shock, osmotic stress, low pH, nutrient starvation
GbPRX5-A	WRE3	CCACCT	291	6	-	Pisum sativum	wound inducibility (third region)
GbPRX5-A	WRE3	CCACCT	692	6	-	Pisum sativum	wound inducibility (third region)
GbPRX5-A	WUN-motif	AAATTACTA	1245	9	+	Nicotiana glutinosa	wound-responsive element
GbPRX5-A	ERE	ATTTTAAA	994	8	-	Nicotiana glutinos	Ethylene-responsive element (ERE) in opposite strand
GbPRX5-A	ERE	ATTTCATA	1223	8	-	Nicotiana glutinos	Ethylene-responsive element (ERE) in opposite strand
GbPRX5-A	ERE	ATTTTAAA	1362	8	-	Nicotiana glutinos	Ethylene-responsive element (ERE) in opposite strand
GbPRX5-A	AE-box	AGAAACAA	44	8	+	Arabidopsis thaliana	part of a module for light response
GbPRX5-A	Box 4	ATTAAT	269	6	+	Petroselinum crispum	part of a conserved DNA module involved in light responsiveness
GbPRX5-A	Box 4	ATTAAT	936	6	-	Petroselinum crispum	part of a conserved DNA module involved in light responsiveness
GbPRX5-A	Box 4	ATTAAT	1374	6	-	Petroselinum crispum	part of a conserved DNA module involved in light responsiveness
GbPRX5-A	TCT-motif	TCTTAC	195	6	-	Arabidopsis thaliana	part of a light responsive element
GbPRX5-A	TCT-motif	TCTTAC	376	6	-	Arabidopsis thaliana	part of a light responsive element
GbPRX1-A	ARE	AAACCA	724	6	+	Zea mays	cis-acting regulatory element essential for the anaerobic induction
GbPRX1-A	MBS	CAACTG	1464	6	-	Arabidopsis thaliana	MYB binding site involved in drought-inducibility
GbPRX1-A	MYC	CAATTG	220	6	+	Arabidopsis thaliana	necessary for induction in dehydrated plants
GbPRX1-A	MYC	CATTTG	276	6	-	Arabidopsis thaliana	necessary for induction in dehydrated plants
GbPRX1-A	MYC	CATTTG	385	6	-	Arabidopsis thaliana	necessary for induction in dehydrated plants
GbPRX1-A	MYC	CAATTG	599	6	+	Arabidopsis thaliana	necessary for induction in dehydrated plants
GbPRX1-A	MYC	CAATTG	671	6	+	Arabidopsis thaliana	necessary for induction in dehydrated plants
GbPRX1-A	MYC	CATTTG	728	6	-	Arabidopsis thaliana	necessary for induction in dehydrated plants
GbPRX1-A	MYC	CATTTG	1290	6	-	Arabidopsis thaliana	necessary for induction in dehydrated plants
GbPRX1-A	ABRE	ACGTG	1340	5	+	Arabidopsis thaliana	cis-acting element involved in the abscisic acid responsiveness
GbPRX1-A	ABRE	ACGTG	1392	5	-	Arabidopsis thaliana	cis-acting element involved in the abscisic acid responsiveness
GbPRX1-A	AuxRR-core	GGTCCAT	1132	7	+	Nicotiana tabacum	cis-acting regulatory element involved in auxin responsiveness
GbPRX1-A	ERE	ATTTCATA	5	8	+	Nicotiana glutinos	Ethylene-responsive element (ERE) in opposite strand
GbPRX1-A	ERE	ATTTTAAA	406	8	+	Nicotiana glutinos	Ethylene-responsive element (ERE) in opposite strand
GbPRX1-A	ERE	ATTTTAAA	1030	8	+	Nicotiana glutinos	Ethylene-responsive element (ERE) in opposite strand
GbPRX1-A	ERE	ATTTTAAA	1032	8	-	Nicotiana glutinos	Ethylene-responsive element (ERE) in opposite strand
GbPRX1-A	Myb	CAACTG	1464	6	-	Arabidopsis thaliana	Myb protein binding sequence
GbPRX1-A	MYB	TAACCA	129	6	-	Arabidopsis thaliana	Myb protein binding sequence
GbPRX1-A	MYB	CAACAG	1461	6	+	Arabidopsis thaliana	Myb protein binding sequence
GbPRX1-A	AE-box	AGAAACAA	361	8	+	Arabidopsis thaliana	part of a module for light response
GbPRX1-A	Box 4	ATTAAT	687	6	+	Petroselinum crispum	part of a conserved DNA module involved in light responsiveness
GbPRX1-A	Box 4	ATTAAT	838	6	-	Petroselinum crispum	part of a conserved DNA module involved in light responsiveness
GbPRX1-A	Box 4	ATTAAT	1019	6	-	Petroselinum crispum	part of a conserved DNA module involved in light responsiveness
GbPRX1-A	Box 4	ATTAAT	1038	6	-	Petroselinum crispum	part of a conserved DNA module involved in light responsiveness
GbPRX1-A	Box 4	ATTAAT	1055	6	-	Petroselinum crispum	part of a conserved DNA module involved in light responsiveness
GbPRX1-A	CAG-motif	GAAAGGCAGAC	1331	10	+	Arabidopsis thaliana	part of a light response element
GbPRX1-A	G-box	CAGACGTGGCA	1337	10	+	Nicotiana plumbaginifolia	cis-acting regulatory element involved in light responsiveness
GbPRX1-A	G-box	CACGTC	1339	6	-	Zea mays	cis-acting regulatory element involved in light responsiveness
GbPRX1-A	G-box	CCACGTAA	1391	8	+	Brassica napus	cis-acting regulatory element involved in light responsiveness
GbPRX1-A	G-box	TACGTG	1392	6	-	Arabidopsis thaliana	cis-acting regulatory element involved in light responsiveness
GbPRX1-A	GT1-motif	GGTTAA	130	6	+	Arabidopsis thaliana	light responsive element
GbPRX1-A	GT1-motif	GGTTAA	1236	6	-	Arabidopsis thaliana	light responsive element
GbPRX10-D	ARE	AAACCA	1396	6	+	Zea mays	cis-acting regulatory element essential for the anaerobic induction
GbPRX10-D	MYC	CATGTG	814	6	+	Arabidopsis thaliana	necessary for induction in dehydrated plants
GbPRX10-D	MYC	CATGTG	990	6	-	Arabidopsis thaliana	necessary for induction in dehydrated plants
GbPRX10-D	MYC	CAATTG	1174	6	-	Arabidopsis thaliana	necessary for induction in dehydrated plants
GbPRX10-D	STRE	AGGGG	1435	5	-	Arabidopsis thaliana	activation by heat shock, osmotic stress, low pH, nutrient starvation
GbPRX10-D	CGTCA-motif	CGTCA	1014	5	+	Hordeum vulgare	cis-acting regulatory element involved in the MeJA-responsiveness
GbPRX10-D	ERE	ATTTCATA	468	8	-	Nicotiana glutinos	Ethylene-responsive element (ERE) in opposite strand
GbPRX10-D	ERE	ATTTTAAA	900	8	-	Nicotiana glutinos	Ethylene-responsive element (ERE) in opposite strand
GbPRX10-D	P-box	CCTTTTG	1249	7	-	Oryza sativa	gibberellin-responsive element
GbPRX10-D	TCA-element	CCATCTTTTT	525	9	+	Nicotiana tabacum	cis-acting element involved in salicylic acid responsiveness
GbPRX10-D	TCA-element	CCATCTTTTT	686	9	-	Nicotiana tabacum	cis-acting element involved in salicylic acid responsiveness
GbPRX10-D	TGACG-motif	TGACG	1014	5	-	Hordeum vulgare	cis-acting regulatory element involved in the MeJA-responsiveness
GbPRX10-D	MYB	TAACCA	1245	6	+	Arabidopsis thaliana	Myb protein binding sequence
GbPRX10-D	MYB	CAACCA	1301	6	-	Arabidopsis thaliana	Myb protein binding sequence
GbPRX10-D	Box 4	ATTAAT	185	6	+	Petroselinum crispum	part of a conserved DNA module involved in light responsiveness
GbPRX10-D	Box 4	ATTAAT	1451	6	-	Petroselinum crispum	part of a conserved DNA module involved in light responsiveness
GbPRX10-D	GT1-motif	GGTTAA	695	6	+	Arabidopsis thaliana	light responsive element
GbPRX10-D	GT1-motif	GGTTAA	735	6	-	Arabidopsis thaliana	light responsive element
GbPRX10-D	GT1-motif	GGTTAA	1244	6	-	Arabidopsis thaliana	light responsive element
GbPRX10-D	I-box	TGATAATGT	1265	9	-	Solanum tuberosum	part of a light responsive element
GbPRX10-D	MRE	AACCTAA	1403	7	+	Petroselinum crispum	MYB binding site involved in light responsiveness
GbPRX10-D	TCT-motif	TCTTAC	886	6	+	Arabidopsis thaliana	part of a light responsive element
GbPRX13-D	ARE	AAACCA	10	6	+	Zea mays	cis-acting regulatory element essential for the anaerobic induction
GbPRX13-D	MBS	CAACTG	983	6	+	Arabidopsis thaliana	MYB binding site involved in drought-inducibility
GbPRX13-D	MYC	CATTTG	349	6	+	Arabidopsis thaliana	necessary for induction in dehydrated plants
GbPRX13-D	MYC	CAATTG	1320	6	-	Arabidopsis thaliana	necessary for induction in dehydrated plants
GbPRX13-D	STRE	AGGGG	1467	5	+	Arabidopsis thaliana	activation by heat shock, osmotic stress, low pH, nutrient starvation
GbPRX13-D	WUN-motif	AAATTACT	838	8	+	Nicotiana glutinosa	wound-responsive element
GbPRX13-D	ABRE	CGTACGTGCA	427	9	+	Hordeum vulgare	cis-acting element involved in the abscisic acid responsiveness
GbPRX13-D	CGTCA-motif	CGTCA	242	5	+	Hordeum vulgare	cis-acting regulatory element involved in the MeJA-responsiveness
GbPRX13-D	ERE	ATTTCATA	777	8	-	Nicotiana glutinos	Ethylene-responsive element (ERE) in opposite strand
GbPRX13-D	P-box	CCTTTTG	447	7	+	Oryza sativa	gibberellin-responsive element
GbPRX13-D	TGACG-motif	TGACG	242	5	-	Hordeum vulgare	cis-acting regulatory element involved in the MeJA-responsiveness
GbPRX13-D	AT-rich element	ATAGAAATCAA	563	10	-	Glycine max	binding site of AT-rich DNA binding protein (ATBP-1)
GbPRX13-D	Myb	TAACTG	72	6	+	Arabidopsis thaliana	Myb protein binding sequence
GbPRX13-D	Myb	CAACTG	983	6	+	Arabidopsis thaliana	Myb protein binding sequence
GbPRX13-D	Myb	TAACTG	1393	6	+	Arabidopsis thaliana	Myb protein binding sequence
GbPRX13-D	MYB	CAACCA	814	6	-	Arabidopsis thaliana	Myb protein binding sequence
GbPRX13-D	MYB	CAACAG	1069	6	-	Arabidopsis thaliana	Myb protein binding sequence
GbPRX13-D	MYB	CAACAG	1396	6	-	Arabidopsis thaliana	Myb protein binding sequence
GbPRX13-D	MYB	CAACCA	1418	6	-	Arabidopsis thaliana	Myb protein binding sequence
GbPRX13-D	GATA-motif	GATAGGA	851	7	+	Arabidopsis thaliana	part of a light responsive element
GbPRX13-D	GATA-motif	AAGATAAGATT	1149	10	+	Arabidopsis thaliana	part of a light responsive element
GbPRX13-D	GATA-motif	GATAGGA	1166	7	+	Arabidopsis thaliana	part of a light responsive element
GbPRX13-D	LAMP-element	CTTTATCA	687	8	+	Pisum sativum	part of a light responsive element
GbPRX11-D	DRE1	ACCGAGA	84	7	-	Zea mays	drought responsive element 1
GbPRX11-D	MBS	CAACTG	59	6	-	Arabidopsis thaliana	MYB binding site involved in drought-inducibility
GbPRX11-D	MBS	CAACTG	1140	6	-	Arabidopsis thaliana	MYB binding site involved in drought-inducibility
GbPRX11-D	Myc	TCTCTTA	734	7	-	Arabidopsis thaliana	necessary for induction in dehydrated plants
GbPRX11-D	ABRE	ACGTG	271	5	+	Arabidopsis thaliana	cis-acting element involved in the abscisic acid responsiveness
GbPRX11-D	ABRE	ACGTG	820	5	-	Arabidopsis thaliana	cis-acting element involved in the abscisic acid responsiveness
GbPRX11-D	ABRE	ACGTG	1394	5	-	Arabidopsis thaliana	cis-acting element involved in the abscisic acid responsiveness
GbPRX11-D	ERE	ATTTTAAA	573	8	+	Nicotiana glutinos	Ethylene-responsive element (ERE) in opposite strand
GbPRX11-D	TGA-element	AACGAC	315	6	-	Brassica oleracea	auxin-responsive element
GbPRX11-D	circadian	CAAAGATATC	76	9	+	Lycopersicon esculentum	cis-acting regulatory element involved in circadian control
GbPRX11-D	GCN4_motif	TGAGTCA	683	7	-	Oryza sativa	cis-regulatory element involved in endosperm expression
GbPRX11-D	Myb	CAACTG	59	6	-	Arabidopsis thaliana	Myb protein binding sequence
GbPRX11-D	Myb	CAACTG	1140	6	-	Arabidopsis thaliana	Myb protein binding sequence
GbPRX11-D	MYB	TAACCA	627	6	-	Arabidopsis thaliana	Myb protein binding sequence
GbPRX11-D	AE-box	AGAAACAA	658	8	-	Arabidopsis thaliana	part of a module for light response
GbPRX11-D	Box 4	ATTAAT	139	6	+	Petroselinum crispum	part of a conserved DNA module involved in light responsiveness
GbPRX11-D	Box 4	ATTAAT	516	6	+	Petroselinum crispum	part of a conserved DNA module involved in light responsiveness
GbPRX11-D	Box 4	ATTAAT	938	6	-	Petroselinum crispum	part of a conserved DNA module involved in light responsiveness
GbPRX11-D	G-Box	CACGTT	270	6	-	Pisum sativum	cis-acting regulatory element involved in light responsiveness
GbPRX11-D	G-Box	CACGTT	820	6	+	Pisum sativum	cis-acting regulatory element involved in light responsiveness
GbPRX11-D	G-Box	CACGTT	1394	6	+	Pisum sativum	cis-acting regulatory element involved in light responsiveness
GbPRX11-D	G-box	TAAACGTG	820	8	-	Brassica oleracea	cis-acting regulatory element involved in light responsiveness
GbPRX11-D	GT1-motif	GGTTAAT	628	7	+	Avena sativa	light responsive element
GbPRX11-D	GT1-motif	GGTTAAT	1234	7	-	Avena sativa	light responsive element
GbPRX11-D	GT1-motif	GGTTAA	1235	6	-	Arabidopsis thaliana	light responsive element
GbPRX14-D	ARE	AAACCA	627	6	-	Zea mays	cis-acting regulatory element essential for the anaerobic induction
GbPRX14-D	ARE	AAACCA	802	6	+	Zea mays	cis-acting regulatory element essential for the anaerobic induction
GbPRX14-D	MBS	CAACTG	1493	6	-	Arabidopsis thaliana	MYB binding site involved in drought-inducibility
GbPRX14-D	MYC	CAATTG	92	6	+	Arabidopsis thaliana	necessary for induction in dehydrated plants
GbPRX14-D	MYC	CATTTG	152	6	-	Arabidopsis thaliana	necessary for induction in dehydrated plants
GbPRX14-D	MYC	CATTTG	260	6	-	Arabidopsis thaliana	necessary for induction in dehydrated plants
GbPRX14-D	MYC	CAATTG	529	6	+	Arabidopsis thaliana	necessary for induction in dehydrated plants
GbPRX14-D	TC-rich repeats	GTTTTCTTAC	37	9	+	Nicotiana tabacum	cis-acting element involved in defense and stress responsiveness
GbPRX14-D	ABRE	ACGTG	896	5	-	Arabidopsis thaliana	cis-acting element involved in the abscisic acid responsiveness
GbPRX14-D	ABRE	ACGTG	1368	5	+	Arabidopsis thaliana	cis-acting element involved in the abscisic acid responsiveness
GbPRX14-D	ABRE	ACGTG	1420	5	-	Arabidopsis thaliana	cis-acting element involved in the abscisic acid responsiveness
GbPRX14-D	AuxRR-core	GGTCCAT	1017	7	+	Nicotiana tabacum	cis-acting regulatory element involved in auxin responsiveness
GbPRX14-D	ERE	ATTTTAAA	281	8	+	Nicotiana glutinos	Ethylene-responsive element (ERE) in opposite strand
GbPRX14-D	AT-rich element	ATAGAAATCAA	578	10	+	Glycine max	binding site of AT-rich DNA binding protein (ATBP-1)
GbPRX14-D	Myb	CAACTG	1493	6	-	Arabidopsis thaliana	Myb protein binding sequence
GbPRX14-D	MYB	CAACAG	1490	6	+	Arabidopsis thaliana	Myb protein binding sequence
GbPRX14-D	ATCT-motif	AATCTAATCC	841	9	-	Pisum sativum	part of a conserved DNA module involved in light responsiveness
GbPRX14-D	Box 4	ATTAAT	462	6	+	Petroselinum crispum	part of a conserved DNA module involved in light responsiveness
GbPRX14-D	Box 4	ATTAAT	545	6	+	Petroselinum crispum	part of a conserved DNA module involved in light responsiveness
GbPRX14-D	Box 4	ATTAAT	684	6	+	Petroselinum crispum	part of a conserved DNA module involved in light responsiveness
GbPRX14-D	Box 4	ATTAAT	696	6	+	Petroselinum crispum	part of a conserved DNA module involved in light responsiveness
GbPRX14-D	Box 4	ATTAAT	910	6	-	Petroselinum crispum	part of a conserved DNA module involved in light responsiveness
GbPRX14-D	Box 4	ATTAAT	946	6	-	Petroselinum crispum	part of a conserved DNA module involved in light responsiveness
GbPRX14-D	CAG-motif	GAAAGGCAGAC	1359	10	+	Arabidopsis thaliana	part of a light response element
GbPRX14-D	G-Box	CACGTT	896	6	+	Pisum sativum	cis-acting regulatory element involved in light responsiveness
GbPRX14-D	G-box	CAGACGTGGCA	1365	10	+	Nicotiana plumbaginifolia	cis-acting regulatory element involved in light responsiveness
GbPRX14-D	G-box	CACGTC	1367	6	-	Zea mays	cis-acting regulatory element involved in light responsiveness
GbPRX14-D	G-box	CCACGTAA	1419	8	+	Brassica napus	cis-acting regulatory element involved in light responsiveness
GbPRX14-D	G-box	TACGTG	1420	6	-	Arabidopsis thaliana	cis-acting regulatory element involved in light responsiveness
GbPRX14-D	GT1-motif	GGTTAA	2	6	+	Arabidopsis thaliana	light responsive element
GbPRX14-D	GT1-motif	GGTTAAT	1267	7	-	Avena sativa	light responsive element
GbPRX14-D	GT1-motif	GGTTAA	1268	6	-	Arabidopsis thaliana	light responsive element
GhPRX1-A	ARE	AAACCA	1396	6	+	Zea mays	cis-acting regulatory element essential for the anaerobic induction
GhPRX1-A	MYC	CATGTG	991	6	-	Arabidopsis thaliana	necessary for induction in dehydrated plants
GhPRX1-A	MYC	CAATTG	1175	6	-	Arabidopsis thaliana	necessary for induction in dehydrated plants
GhPRX1-A	WUN-motif	CCATTTCAA	80	9	+	Nicotiana glutinosa	wound-responsive element
GhPRX1-A	CGTCA-motif	CGTCA	1437	5	+	Hordeum vulgare	cis-acting regulatory element involved in the MeJA-responsiveness
GhPRX1-A	ERE	ATTTTAAA	901	8	-	Nicotiana glutinos	Ethylene-responsive element (ERE) in opposite strand
GhPRX1-A	P-box	CCTTTTG	1250	7	-	Oryza sativa	gibberellin-responsive element
GhPRX1-A	TGACG-motif	TGACG	1437	5	-	Hordeum vulgare	cis-acting regulatory element involved in the MeJA-responsiveness
GhPRX1-A	AACA_motif	TAACAAACTCCA	1331	11	+	Oryza sativa	involved in endosperm-specific negative expression
GhPRX1-A	MYB	TAACCA	1246	6	+	Arabidopsis thaliana	Myb protein binding sequence
GhPRX1-A	MYB	CAACCA	1302	6	-	Arabidopsis thaliana	Myb protein binding sequence
GhPRX1-A	AT1-motif	AATTATTTTTTATT	456	13	-	Solanum tuberosum	part of a light responsive module
GhPRX1-A	chs-CMA1a	TTACTTAA	1164	8	-	Daucus carota	part of a light responsive element
GhPRX1-A	GA-motif	ATAGATAA	1295	8	-	Arabidopsis thaliana	part of a light responsive element
GhPRX1-A	GT1-motif	GGTTAA	1245	6	-	Arabidopsis thaliana	light responsive element
GhPRX1-A	I-box	TGATAATGT	1266	9	-	Solanum tuberosum	part of a light responsive element
GhPRX1-A	MRE	AACCTAA	1403	7	+	Petroselinum crispum	MYB binding site involved in light responsiveness
GhPRX1-A	TCT-motif	TCTTAC	887	6	+	Arabidopsis thaliana	part of a light responsive element
GhPRX2-A	MYC	CATGTG	829	6	-	Arabidopsis thaliana	necessary for induction in dehydrated plants
GhPRX2-A	MYC	CATTTG	914	6	-	Arabidopsis thaliana	necessary for induction in dehydrated plants
GhPRX2-A	WRE3	CCACCT	796	6	+	Pisum sativum	wound inducibility (third region)
GhPRX2-A	ABRE	ACGTG	47	5	+	Arabidopsis thaliana	cis-acting element involved in the abscisic acid responsiveness
GhPRX2-A	CGTCA-motif	CGTCA	927	5	-	Hordeum vulgare	cis-acting regulatory element involved in the MeJA-responsiveness
GhPRX2-A	P-box	CCTTTTG	39	7	+	Oryza sativa	gibberellin-responsive element
GhPRX2-A	TGACG-motif	TGACG	927	5	+	Hordeum vulgare	cis-acting regulatory element involved in the MeJA-responsiveness
GhPRX2-A	MYB	CAACCA	758	6	-	Arabidopsis thaliana	Myb protein binding sequence
GhPRX2-A	MYB	TAACCA	793	6	+	Arabidopsis thaliana	Myb protein binding sequence
GhPRX2-A	AE-box	AGAAACTT	649	8	+	Arabidopsis thaliana	part of a module for light response
GhPRX2-A	Box 4	ATTAAT	819	6	-	Petroselinum crispum	part of a conserved DNA module involved in light responsiveness
GhPRX2-A	Box 4	ATTAAT	987	6	-	Petroselinum crispum	part of a conserved DNA module involved in light responsiveness
GhPRX2-A	G-box	TAACACGTAG	45	9	-	Brassica oleracea	cis-acting regulatory element involved in light responsiveness
GhPRX2-A	G-box	TACGTG	46	6	+	Arabidopsis thaliana	cis-acting regulatory element involved in light responsiveness
GhPRX2-A	GT1-motif	GGTTAAT	791	7	-	Avena sativa	light responsive element
GhPRX2-A	GT1-motif	GGTTAA	792	6	-	Arabidopsis thaliana	light responsive element
GhPRX2-A	TCT-motif	TCTTAC	494	6	+	Arabidopsis thaliana	part of a light responsive element
GhPRX2-A	TCT-motif	TCTTAC	663	6	+	Arabidopsis thaliana	part of a light responsive element
GhPRX3-A	ARE	AAACCA	375	6	+	Zea mays	cis-acting regulatory element essential for the anaerobic induction
GhPRX3-A	ARE	AAACCA	542	6	-	Zea mays	cis-acting regulatory element essential for the anaerobic induction
GhPRX3-A	ARE	AAACCA	925	6	+	Zea mays	cis-acting regulatory element essential for the anaerobic induction
GhPRX3-A	ARE	AAACCA	1486	6	+	Zea mays	cis-acting regulatory element essential for the anaerobic induction
GhPRX3-A	MYC	CATTTG	402	6	+	Arabidopsis thaliana	necessary for induction in dehydrated plants
GhPRX3-A	MYC	CATTTG	580	6	+	Arabidopsis thaliana	necessary for induction in dehydrated plants
GhPRX3-A	MYC	CATTTG	831	6	+	Arabidopsis thaliana	necessary for induction in dehydrated plants
GhPRX3-A	WRE3	CCACCT	900	6	-	Pisum sativum	wound inducibility (third region)
GhPRX3-A	AuxRR-core	GGTCCAT	131	7	-	Nicotiana tabacum	cis-acting regulatory element involved in auxin responsiveness
GhPRX3-A	AuxRR-core	GGTCCAT	1001	7	-	Nicotiana tabacum	cis-acting regulatory element involved in auxin responsiveness
GhPRX3-A	CGTCA-motif	CGTCA	808	5	+	Hordeum vulgare	cis-acting regulatory element involved in the MeJA-responsiveness
GhPRX3-A	P-box	CCTTTTG	5	7	-	Oryza sativa	gibberellin-responsive element
GhPRX3-A	TCA-element	CCATCTTTTT	453	9	+	Nicotiana tabacum	cis-acting element involved in salicylic acid responsiveness
GhPRX3-A	TGACG-motif	TGACG	808	5	-	Hordeum vulgare	cis-acting regulatory element involved in the MeJA-responsiveness
GhPRX3-A	HD-Zip 1	CAAT(A/T)ATTG	950	8.5	-	Arabidopsis thaliana	element involved in differentiation of the palisade mesophyll cells
GhPRX3-A	MYB	CAACAG	303	6	-	Arabidopsis thaliana	Myb protein binding sequence
GhPRX3-A	O2-site	GATGACATGG	984	9	-	Zea mays	cis-acting regulatory element involved in zein metabolism regulation
GhPRX3-A	GATA-motif	GATAGGA	692	7	+	Arabidopsis thaliana	part of a light responsive element
GhPRX3-A	GT1-motif	GGTTAA	205	6	+	Arabidopsis thaliana	light responsive element
GhPRX3-A	GT1-motif	GGTTAA	1434	6	-	Arabidopsis thaliana	light responsive element
GhPRX3-A	I-box	GTATAAGGCC	1329	9	-	Larix laricina	part of a light responsive element
GhPRX4-A	MBS	CAACTG	972	6	-	Arabidopsis thaliana	MYB binding site involved in drought-inducibility
GhPRX4-A	MYC	CATTTG	1352	6	-	Arabidopsis thaliana	necessary for induction in dehydrated plants
GhPRX4-A	STRE	AGGGG	1406	5	-	Arabidopsis thaliana	activation by heat shock, osmotic stress, low pH, nutrient starvation
GhPRX4-A	WUN-motif	CCATTTCAA	1394	9	+	Nicotiana glutinosa	wound-responsive element
GhPRX4-A	ABRE	ACGTG	75	5	+	Arabidopsis thaliana	cis-acting element involved in the abscisic acid responsiveness
GhPRX4-A	ABRE	ACGTG	626	5	-	Arabidopsis thaliana	cis-acting element involved in the abscisic acid responsiveness
GhPRX4-A	ABRE	ACGTG	1242	5	-	Arabidopsis thaliana	cis-acting element involved in the abscisic acid responsiveness
GhPRX4-A	CGTCA-motif	CGTCA	614	5	+	Hordeum vulgare	cis-acting regulatory element involved in the MeJA-responsiveness
GhPRX4-A	ERE	ATTTTAAA	380	8	+	Nicotiana glutinos	Ethylene-responsive element (ERE) in opposite strand
GhPRX4-A	ERE	ATTTTAAA	382	8	-	Nicotiana glutinos	Ethylene-responsive element (ERE) in opposite strand
GhPRX4-A	ERE	ATTTTAAA	640	8	+	Nicotiana glutinos	Ethylene-responsive element (ERE) in opposite strand
GhPRX4-A	TGACG-motif	TGACG	614	5	-	Hordeum vulgare	cis-acting regulatory element involved in the MeJA-responsiveness
GhPRX4-A	TGA-element	AACGAC	119	6	-	Brassica oleracea	auxin-responsive element
GhPRX4-A	GCN4_motif	TGAGTCA	489	7	-	Oryza sativa	cis-regulatory element involved in endosperm expression
GhPRX4-A	Myb	CAACTG	972	6	-	Arabidopsis thaliana	Myb protein binding sequence
GhPRX4-A	MYB	TAACCA	433	6	-	Arabidopsis thaliana	Myb protein binding sequence
GhPRX4-A	4cl-CMA2b	TCTCACCAACCACA	1481	13	+	Solanum tuberosum	light responsive element
GhPRX4-A	Box 4	ATTAAT	323	6	+	Petroselinum crispum	part of a conserved DNA module involved in light responsiveness
GhPRX4-A	Box 4	ATTAAT	783	6	-	Petroselinum crispum	part of a conserved DNA module involved in light responsiveness
GhPRX4-A	Box 4	ATTAAT	1011	6	-	Petroselinum crispum	part of a conserved DNA module involved in light responsiveness
GhPRX4-A	G-Box	CACGTT	74	6	-	Pisum sativum	cis-acting regulatory element involved in light responsiveness
GhPRX4-A	G-Box	CACGTT	626	6	+	Pisum sativum	cis-acting regulatory element involved in light responsiveness
GhPRX4-A	G-Box	CACGTT	1242	6	+	Pisum sativum	cis-acting regulatory element involved in light responsiveness
GhPRX4-A	G-box	TAAACGTG	626	8	-	Brassica oleracea	cis-acting regulatory element involved in light responsiveness
GhPRX4-A	GT1-motif	GGTTAAT	434	7	+	Avena sativa	light responsive element
GhPRX4-A	Sp1	GGGCGG	224	6	-	Oryza sativa	light responsive element
GhPRX4-A	TCT-motif	TCTTAC	1427	6	+	Arabidopsis thaliana	part of a light responsive element
GhPRX5-A	ARE	AAACCA	852	6	+	Zea mays	cis-acting regulatory element essential for the anaerobic induction
GhPRX5-A	ARE	AAACCA	1192	6	+	Zea mays	cis-acting regulatory element essential for the anaerobic induction
GhPRX5-A	LTR	CCGAAA	407	6	+	Hordeum vulgare	cis-acting element involved in low-temperature responsiveness
GhPRX5-A	Myc	TCTCTTA	1429	7	+	Arabidopsis thaliana	necessary for induction in dehydrated plants
GhPRX5-A	MYC	CAATTG	401	6	+	Arabidopsis thaliana	necessary for induction in dehydrated plants
GhPRX5-A	MYC	CATTTG	898	6	+	Arabidopsis thaliana	necessary for induction in dehydrated plants
GhPRX5-A	MYC	CAATTG	1344	6	-	Arabidopsis thaliana	necessary for induction in dehydrated plants
GhPRX5-A	STRE	AGGGG	309	5	+	Arabidopsis thaliana	activation by heat shock, osmotic stress, low pH, nutrient starvation
GhPRX5-A	STRE	AGGGG	331	5	+	Arabidopsis thaliana	activation by heat shock, osmotic stress, low pH, nutrient starvation
GhPRX5-A	STRE	AGGGG	1335	5	+	Arabidopsis thaliana	activation by heat shock, osmotic stress, low pH, nutrient starvation
GhPRX5-A	STRE	AGGGG	1394	5	-	Arabidopsis thaliana	activation by heat shock, osmotic stress, low pH, nutrient starvation
GhPRX5-A	WUN-motif	CCATTTCAA	196	9	-	Nicotiana glutinosa	wound-responsive element
GhPRX5-A	ABRE	ACGTG	108	5	-	Arabidopsis thaliana	cis-acting element involved in the abscisic acid responsiveness
GhPRX5-A	TCA-element	CCATCTTTTT	422	9	+	Nicotiana tabacum	cis-acting element involved in salicylic acid responsiveness
GhPRX5-A	GCN4_motif	TGAGTCA	959	7	+	Oryza sativa	cis-regulatory element involved in endosperm expression
GhPRX5-A	HD-Zip 1	CAAT(A/T)ATTG	1074	8.5	-	Arabidopsis thaliana	element involved in differentiation of the palisade mesophyll cells
GhPRX5-A	MBSI	TTTTTACGGTTA	1151	11	-	Petunia hybrida	MYB binding site involved in flavonoid biosynthetic genes regulation
GhPRX5-A	MYB	CAACCA	856	6	+	Arabidopsis thaliana	Myb protein binding sequence
GhPRX5-A	MYB	TAACCA	1408	6	+	Arabidopsis thaliana	Myb protein binding sequence
GhPRX5-A	Box 4	ATTAAT	610	6	+	Petroselinum crispum	part of a conserved DNA module involved in light responsiveness
GhPRX5-A	chs-CMA1a	TTACTTAA	172	8	-	Daucus carota	part of a light responsive element
GhPRX5-A	G-box	CACGTC	108	6	+	Zea mays	cis-acting regulatory element involved in light responsiveness
GhPRX5-A	GT1-motif	GGTTAA	185	6	+	Arabidopsis thaliana	light responsive element
GhPRX5-A	GT1-motif	GGTTAA	1150	6	-	Arabidopsis thaliana	light responsive element
GhPRX5-A	LAMP-element	CTTTATCA	758	8	+	Pisum sativum	part of a light responsive element
GhPRX6-A	ARE	AAACCA	404	6	-	Zea mays	cis-acting regulatory element essential for the anaerobic induction
GhPRX6-A	Myc	TCTCTTA	1157	7	+	Arabidopsis thaliana	necessary for induction in dehydrated plants
GhPRX6-A	MYC	CAATTG	328	6	+	Arabidopsis thaliana	necessary for induction in dehydrated plants
GhPRX6-A	MYC	CATTTG	899	6	-	Arabidopsis thaliana	necessary for induction in dehydrated plants
GhPRX6-A	MYC	CATTTG	1396	6	+	Arabidopsis thaliana	necessary for induction in dehydrated plants
GhPRX6-A	STRE	AGGGG	309	5	-	Arabidopsis thaliana	activation by heat shock, osmotic stress, low pH, nutrient starvation
GhPRX6-A	WRE3	CCACCT	114	6	-	Pisum sativum	wound inducibility (third region)
GhPRX6-A	WRE3	CCACCT	516	6	-	Pisum sativum	wound inducibility (third region)
GhPRX6-A	WUN-motif	AAATTACTA	1067	9	+	Nicotiana glutinosa	wound-responsive element
GhPRX6-A	ERE	ATTTTAAA	816	8	-	Nicotiana glutinos	Ethylene-responsive element (ERE) in opposite strand
GhPRX6-A	ERE	ATTTCATA	1045	8	-	Nicotiana glutinos	Ethylene-responsive element (ERE) in opposite strand
GhPRX6-A	ERE	ATTTTAAA	1184	8	-	Nicotiana glutinos	Ethylene-responsive element (ERE) in opposite strand
GhPRX6-A	Myb	TAACTG	1377	6	-	Arabidopsis thaliana	Myb protein binding sequence
GhPRX6-A	MYB	CAACAG	835	6	+	Arabidopsis thaliana	Myb protein binding sequence
GhPRX6-A	MYB	TAACCA	1367	6	-	Arabidopsis thaliana	Myb protein binding sequence
GhPRX6-A	MYB	CAACAG	1480	6	+	Arabidopsis thaliana	Myb protein binding sequence
GhPRX6-A	AE-box	AGAAACAA	1433	8	+	Arabidopsis thaliana	part of a module for light response
GhPRX6-A	Box 4	ATTAAT	92	6	+	Petroselinum crispum	part of a conserved DNA module involved in light responsiveness
GhPRX6-A	Box 4	ATTAAT	758	6	-	Petroselinum crispum	part of a conserved DNA module involved in light responsiveness
GhPRX6-A	Box 4	ATTAAT	1196	6	-	Petroselinum crispum	part of a conserved DNA module involved in light responsiveness
GhPRX6-A	GT1-motif	GGTTAA	1368	6	+	Arabidopsis thaliana	light responsive element
GhPRX6-A	Sp1	GGGCGG	1386	6	-	Oryza sativa	light responsive element
GhPRX6-A	TCT-motif	TCTTAC	18	6	-	Arabidopsis thaliana	part of a light responsive element
GhPRX6-A	TCT-motif	TCTTAC	199	6	-	Arabidopsis thaliana	part of a light responsive element
GhPRX7-A	ARE	AAACCA	726	6	+	Zea mays	cis-acting regulatory element essential for the anaerobic induction
GhPRX7-A	MBS	CAACTG	1464	6	-	Arabidopsis thaliana	MYB binding site involved in drought-inducibility
GhPRX7-A	MYC	CAATTG	224	6	+	Arabidopsis thaliana	necessary for induction in dehydrated plants
GhPRX7-A	MYC	CATTTG	280	6	-	Arabidopsis thaliana	necessary for induction in dehydrated plants
GhPRX7-A	MYC	CATTTG	389	6	-	Arabidopsis thaliana	necessary for induction in dehydrated plants
GhPRX7-A	MYC	CAATTG	601	6	+	Arabidopsis thaliana	necessary for induction in dehydrated plants
GhPRX7-A	MYC	CAATTG	673	6	+	Arabidopsis thaliana	necessary for induction in dehydrated plants
GhPRX7-A	MYC	CATTTG	730	6	-	Arabidopsis thaliana	necessary for induction in dehydrated plants
GhPRX7-A	MYC	CATTTG	1290	6	-	Arabidopsis thaliana	necessary for induction in dehydrated plants
GhPRX7-A	ABRE	ACGTG	1340	5	+	Arabidopsis thaliana	cis-acting element involved in the abscisic acid responsiveness
GhPRX7-A	ABRE	ACGTG	1392	5	-	Arabidopsis thaliana	cis-acting element involved in the abscisic acid responsiveness
GhPRX7-A	AuxRR-core	GGTCCAT	1132	7	+	Nicotiana tabacum	cis-acting regulatory element involved in auxin responsiveness
GhPRX7-A	ERE	ATTTCATA	9	8	+	Nicotiana glutinos	Ethylene-responsive element (ERE) in opposite strand
GhPRX7-A	ERE	ATTTTAAA	410	8	+	Nicotiana glutinos	Ethylene-responsive element (ERE) in opposite strand
GhPRX7-A	ERE	ATTTTAAA	1030	8	+	Nicotiana glutinos	Ethylene-responsive element (ERE) in opposite strand
GhPRX7-A	ERE	ATTTTAAA	1032	8	-	Nicotiana glutinos	Ethylene-responsive element (ERE) in opposite strand
GhPRX7-A	Myb	CAACTG	1464	6	-	Arabidopsis thaliana	Myb protein binding sequence
GhPRX7-A	MYB	TAACCA	133	6	-	Arabidopsis thaliana	Myb protein binding sequence
GhPRX7-A	MYB	CAACAG	1461	6	+	Arabidopsis thaliana	Myb protein binding sequence
GhPRX7-A	AE-box	AGAAACAA	365	8	+	Arabidopsis thaliana	part of a module for light response
GhPRX7-A	Box 4	ATTAAT	689	6	+	Petroselinum crispum	part of a conserved DNA module involved in light responsiveness
GhPRX7-A	Box 4	ATTAAT	838	6	-	Petroselinum crispum	part of a conserved DNA module involved in light responsiveness
GhPRX7-A	Box 4	ATTAAT	1019	6	-	Petroselinum crispum	part of a conserved DNA module involved in light responsiveness
GhPRX7-A	Box 4	ATTAAT	1038	6	-	Petroselinum crispum	part of a conserved DNA module involved in light responsiveness
GhPRX7-A	Box 4	ATTAAT	1055	6	-	Petroselinum crispum	part of a conserved DNA module involved in light responsiveness
GhPRX7-A	CAG-motif	GAAAGGCAGAC	1331	10	+	Arabidopsis thaliana	part of a light response element
GhPRX7-A	G-box	CAGACGTGGCA	1337	10	+	Nicotiana plumbaginifolia	cis-acting regulatory element involved in light responsiveness
GhPRX7-A	G-box	CACGTC	1339	6	-	Zea mays	cis-acting regulatory element involved in light responsiveness
GhPRX7-A	G-box	CCACGTAA	1391	8	+	Brassica napus	cis-acting regulatory element involved in light responsiveness
GhPRX7-A	G-box	TACGTG	1392	6	-	Arabidopsis thaliana	cis-acting regulatory element involved in light responsiveness
GhPRX7-A	GT1-motif	GGTTAA	134	6	+	Arabidopsis thaliana	light responsive element
GhPRX7-A	GT1-motif	GGTTAA	1236	6	-	Arabidopsis thaliana	light responsive element
GhPRX8-D	ARE	AAACCA	1396	6	+	Zea mays	cis-acting regulatory element essential for the anaerobic induction
GhPRX8-D	MYC	CATGTG	812	6	+	Arabidopsis thaliana	necessary for induction in dehydrated plants
GhPRX8-D	MYC	CATGTG	988	6	-	Arabidopsis thaliana	necessary for induction in dehydrated plants
GhPRX8-D	MYC	CAATTG	1174	6	-	Arabidopsis thaliana	necessary for induction in dehydrated plants
GhPRX8-D	CGTCA-motif	CGTCA	1012	5	+	Hordeum vulgare	cis-acting regulatory element involved in the MeJA-responsiveness
GhPRX8-D	ERE	ATTTTAAA	898	8	-	Nicotiana glutinos	Ethylene-responsive element (ERE) in opposite strand
GhPRX8-D	P-box	CCTTTTG	1249	7	-	Oryza sativa	gibberellin-responsive element
GhPRX8-D	TCA-element	CCATCTTTTT	523	9	+	Nicotiana tabacum	cis-acting element involved in salicylic acid responsiveness
GhPRX8-D	TCA-element	CCATCTTTTT	684	9	-	Nicotiana tabacum	cis-acting element involved in salicylic acid responsiveness
GhPRX8-D	TGACG-motif	TGACG	1012	5	-	Hordeum vulgare	cis-acting regulatory element involved in the MeJA-responsiveness
GhPRX8-D	MYB	TAACCA	1245	6	+	Arabidopsis thaliana	Myb protein binding sequence
GhPRX8-D	MYB	CAACCA	1301	6	-	Arabidopsis thaliana	Myb protein binding sequence
GhPRX8-D	Box 4	ATTAAT	197	6	+	Petroselinum crispum	part of a conserved DNA module involved in light responsiveness
GhPRX8-D	Box 4	ATTAAT	1451	6	-	Petroselinum crispum	part of a conserved DNA module involved in light responsiveness
GhPRX8-D	GT1-motif	GGTTAA	693	6	+	Arabidopsis thaliana	light responsive element
GhPRX8-D	GT1-motif	GGTTAA	733	6	-	Arabidopsis thaliana	light responsive element
GhPRX8-D	GT1-motif	GGTTAA	1244	6	-	Arabidopsis thaliana	light responsive element
GhPRX8-D	I-box	TGATAATGT	1265	9	-	Solanum tuberosum	part of a light responsive element
GhPRX8-D	MRE	AACCTAA	1403	7	+	Petroselinum crispum	MYB binding site involved in light responsiveness
GhPRX8-D	TCT-motif	TCTTAC	884	6	+	Arabidopsis thaliana	part of a light responsive element
GhPRX9-D	ARE	AAACCA	611	6	-	Zea mays	cis-acting regulatory element essential for the anaerobic induction
GhPRX9-D	LTR	CCGAAA	1047	6	-	Hordeum vulgare	cis-acting element involved in low-temperature responsiveness
GhPRX9-D	MYC	CAATTG	185	6	+	Arabidopsis thaliana	necessary for induction in dehydrated plants
GhPRX9-D	MYC	CATGTG	197	6	-	Arabidopsis thaliana	necessary for induction in dehydrated plants
GhPRX9-D	MYC	CATTTG	487	6	-	Arabidopsis thaliana	necessary for induction in dehydrated plants
GhPRX9-D	MYC	CATTTG	912	6	+	Arabidopsis thaliana	necessary for induction in dehydrated plants
GhPRX9-D	MYC	CATTTG	1264	6	-	Arabidopsis thaliana	necessary for induction in dehydrated plants
GhPRX9-D	STRE	AGGGG	1432	5	-	Arabidopsis thaliana	activation by heat shock, osmotic stress, low pH, nutrient starvation
GhPRX9-D	WRE3	CCACCT	164	6	+	Pisum sativum	wound inducibility (third region)
GhPRX9-D	WUN-motif	AAATTACT	1092	8	-	Nicotiana glutinosa	wound-responsive element
GhPRX9-D	ABRE	ACGTG	473	5	-	Arabidopsis thaliana	cis-acting element involved in the abscisic acid responsiveness
GhPRX9-D	ERE	ATTTTAAA	672	8	+	Nicotiana glutinos	Ethylene-responsive element (ERE) in opposite strand
GhPRX9-D	ERE	ATTTCATA	783	8	-	Nicotiana glutinos	Ethylene-responsive element (ERE) in opposite strand
GhPRX9-D	ERE	ATTTTAAA	795	8	+	Nicotiana glutinos	Ethylene-responsive element (ERE) in opposite strand
GhPRX9-D	ERE	ATTTTAAA	861	8	+	Nicotiana glutinos	Ethylene-responsive element (ERE) in opposite strand
GhPRX9-D	ERE	ATTTTAAA	922	8	+	Nicotiana glutinos	Ethylene-responsive element (ERE) in opposite strand
GhPRX9-D	ERE	ATTTTAAA	1096	8	+	Nicotiana glutinos	Ethylene-responsive element (ERE) in opposite strand
GhPRX9-D	Myb	TAACTG	335	6	-	Arabidopsis thaliana	Myb protein binding sequence
GhPRX9-D	MYB	TAACCA	161	6	+	Arabidopsis thaliana	Myb protein binding sequence
GhPRX9-D	ATC-motif	AGCTATCCA	133	9	-	Arabidopsis thaliana	part of a conserved DNA module involved in light responsiveness
GhPRX9-D	Box 4	ATTAAT	821	6	-	Petroselinum crispum	part of a conserved DNA module involved in light responsiveness
GhPRX9-D	Box 4	ATTAAT	949	6	-	Petroselinum crispum	part of a conserved DNA module involved in light responsiveness
GhPRX9-D	G-box	CCACGTAA	472	8	+	Brassica napus	cis-acting regulatory element involved in light responsiveness
GhPRX9-D	G-box	TACGTG	473	6	-	Arabidopsis thaliana	cis-acting regulatory element involved in light responsiveness
GhPRX9-D	GT1-motif	GGTTAAT	159	7	-	Avena sativa	light responsive element
GhPRX9-D	GT1-motif	GGTTAA	160	6	-	Arabidopsis thaliana	light responsive element
GhPRX9-D	TCT-motif	TCTTAC	31	6	+	Arabidopsis thaliana	part of a light responsive element
GhPRX10-D	MBS	CAACTG	594	6	+	Arabidopsis thaliana	MYB binding site involved in drought-inducibility
GhPRX10-D	MBS	CAACTG	1453	6	+	Arabidopsis thaliana	MYB binding site involved in drought-inducibility
GhPRX10-D	MYC	CAATTG	931	6	-	Arabidopsis thaliana	necessary for induction in dehydrated plants
GhPRX10-D	STRE	AGGGG	1078	5	+	Arabidopsis thaliana	activation by heat shock, osmotic stress, low pH, nutrient starvation
GhPRX10-D	WRE3	CCACCT	752	6	-	Pisum sativum	wound inducibility (third region)
GhPRX10-D	WUN-motif	AAATTACT	449	8	+	Nicotiana glutinosa	wound-responsive element
GhPRX10-D	ABRE	CGTACGTGCA	38	9	+	Hordeum vulgare	cis-acting element involved in the abscisic acid responsiveness
GhPRX10-D	ABRE	ACGTG	1366	5	+	Arabidopsis thaliana	cis-acting element involved in the abscisic acid responsiveness
GhPRX10-D	ERE	ATTTCATA	388	8	-	Nicotiana glutinos	Ethylene-responsive element (ERE) in opposite strand
GhPRX10-D	P-box	CCTTTTG	58	7	+	Oryza sativa	gibberellin-responsive element
GhPRX10-D	AT-rich element	ATAGAAATCAA	174	10	-	Glycine max	binding site of AT-rich DNA binding protein (ATBP-1)
GhPRX10-D	Myb	CAACTG	594	6	+	Arabidopsis thaliana	Myb protein binding sequence
GhPRX10-D	Myb	TAACTG	1004	6	+	Arabidopsis thaliana	Myb protein binding sequence
GhPRX10-D	Myb	CAACTG	1453	6	+	Arabidopsis thaliana	Myb protein binding sequence
GhPRX10-D	MYB	CAACCA	425	6	-	Arabidopsis thaliana	Myb protein binding sequence
GhPRX10-D	MYB	CAACAG	680	6	-	Arabidopsis thaliana	Myb protein binding sequence
GhPRX10-D	MYB	CAACAG	1007	6	-	Arabidopsis thaliana	Myb protein binding sequence
GhPRX10-D	MYB	CAACCA	1029	6	-	Arabidopsis thaliana	Myb protein binding sequence
GhPRX10-D	MYB	CAACAG	1301	6	+	Arabidopsis thaliana	Myb protein binding sequence
GhPRX10-D	MYB	CAACCA	1319	6	+	Arabidopsis thaliana	Myb protein binding sequence
GhPRX10-D	GATA-motif	GATAGGA	462	7	+	Arabidopsis thaliana	part of a light responsive element
GhPRX10-D	GATA-motif	AAGATAAGATT	760	10	+	Arabidopsis thaliana	part of a light responsive element
GhPRX10-D	GATA-motif	GATAGGA	777	7	+	Arabidopsis thaliana	part of a light responsive element
GhPRX10-D	G-box	CCACGTAA	1364	8	-	Brassica napus	cis-acting regulatory element involved in light responsiveness
GhPRX10-D	G-box	TACGTG	1365	6	+	Arabidopsis thaliana	cis-acting regulatory element involved in light responsiveness
GhPRX10-D	LAMP-element	CTTTATCA	298	8	+	Pisum sativum	part of a light responsive element
GhPRX11-D	ARE	AAACCA	353	6	+	Zea mays	cis-acting regulatory element essential for the anaerobic induction
GhPRX11-D	ARE	AAACCA	524	6	-	Zea mays	cis-acting regulatory element essential for the anaerobic induction
GhPRX11-D	ARE	AAACCA	919	6	+	Zea mays	cis-acting regulatory element essential for the anaerobic induction
GhPRX11-D	ARE	AAACCA	1486	6	+	Zea mays	cis-acting regulatory element essential for the anaerobic induction
GhPRX11-D	MYC	CATTTG	825	6	+	Arabidopsis thaliana	necessary for induction in dehydrated plants
GhPRX11-D	TC-rich repeats	GTTTTCTTAC	80	9	+	Nicotiana tabacum	cis-acting element involved in defense and stress responsiveness
GhPRX11-D	WRE3	CCACCT	894	6	-	Pisum sativum	wound inducibility (third region)
GhPRX11-D	AuxRR-core	GGTCCAT	109	7	-	Nicotiana tabacum	cis-acting regulatory element involved in auxin responsiveness
GhPRX11-D	AuxRR-core	GGTCCAT	993	7	-	Nicotiana tabacum	cis-acting regulatory element involved in auxin responsiveness
GhPRX11-D	CGTCA-motif	CGTCA	802	5	+	Hordeum vulgare	cis-acting regulatory element involved in the MeJA-responsiveness
GhPRX11-D	TCA-element	CCATCTTTTT	435	9	+	Nicotiana tabacum	cis-acting element involved in salicylic acid responsiveness
GhPRX11-D	TGACG-motif	TGACG	802	5	-	Hordeum vulgare	cis-acting regulatory element involved in the MeJA-responsiveness
GhPRX11-D	TGA-element	AACGAC	751	6	-	Brassica oleracea	auxin-responsive element
GhPRX11-D	HD-Zip 1	CAAT(A/T)ATTG	942	8.5	-	Arabidopsis thaliana	element involved in differentiation of the palisade mesophyll cells
GhPRX11-D	MYB	CAACAG	281	6	-	Arabidopsis thaliana	Myb protein binding sequence
GhPRX11-D	GATA-motif	GATAGGA	675	7	+	Arabidopsis thaliana	part of a light responsive element
GhPRX11-D	GT1-motif	GGTTAA	183	6	+	Arabidopsis thaliana	light responsive element
GhPRX11-D	GT1-motif	GGTTAA	1440	6	-	Arabidopsis thaliana	light responsive element
GhPRX11-D	I-box	GTATAAGGCC	1334	9	-	Larix laricina	part of a light responsive element
GhPRX12-D	MBS	CAACTG	977	6	-	Arabidopsis thaliana	MYB binding site involved in drought-inducibility
GhPRX12-D	Myc	TCTCTTA	571	7	-	Arabidopsis thaliana	necessary for induction in dehydrated plants
GhPRX12-D	MYC	CATTTG	1340	6	-	Arabidopsis thaliana	necessary for induction in dehydrated plants
GhPRX12-D	STRE	AGGGG	1394	5	-	Arabidopsis thaliana	activation by heat shock, osmotic stress, low pH, nutrient starvation
GhPRX12-D	ABRE	ACGTG	109	5	+	Arabidopsis thaliana	cis-acting element involved in the abscisic acid responsiveness
GhPRX12-D	ABRE	ACGTG	657	5	-	Arabidopsis thaliana	cis-acting element involved in the abscisic acid responsiveness
GhPRX12-D	ABRE	ACGTG	1231	5	-	Arabidopsis thaliana	cis-acting element involved in the abscisic acid responsiveness
GhPRX12-D	ERE	ATTTTAAA	411	8	+	Nicotiana glutinos	Ethylene-responsive element (ERE) in opposite strand
GhPRX12-D	TGA-element	AACGAC	153	6	-	Brassica oleracea	auxin-responsive element
GhPRX12-D	GCN4_motif	TGAGTCA	521	7	-	Oryza sativa	cis-regulatory element involved in endosperm expression
GhPRX12-D	Myb	CAACTG	977	6	-	Arabidopsis thaliana	Myb protein binding sequence
GhPRX12-D	MYB	TAACCA	465	6	-	Arabidopsis thaliana	Myb protein binding sequence
GhPRX12-D	AE-box	AGAAACAA	496	8	-	Arabidopsis thaliana	part of a module for light response
GhPRX12-D	Box 4	ATTAAT	354	6	+	Petroselinum crispum	part of a conserved DNA module involved in light responsiveness
GhPRX12-D	Box 4	ATTAAT	775	6	-	Petroselinum crispum	part of a conserved DNA module involved in light responsiveness
GhPRX12-D	G-Box	CACGTT	108	6	-	Pisum sativum	cis-acting regulatory element involved in light responsiveness
GhPRX12-D	G-Box	CACGTT	657	6	+	Pisum sativum	cis-acting regulatory element involved in light responsiveness
GhPRX12-D	G-Box	CACGTT	1231	6	+	Pisum sativum	cis-acting regulatory element involved in light responsiveness
GhPRX12-D	G-box	TAAACGTG	657	8	-	Brassica oleracea	cis-acting regulatory element involved in light responsiveness
GhPRX12-D	GT1-motif	GGTTAAT	466	7	+	Avena sativa	light responsive element
GhPRX12-D	GT1-motif	GGTTAAT	1071	7	-	Avena sativa	light responsive element
GhPRX12-D	GT1-motif	GGTTAA	1072	6	-	Arabidopsis thaliana	light responsive element
GhPRX13-D	ARE	AAACCA	586	6	+	Zea mays	cis-acting regulatory element essential for the anaerobic induction
GhPRX13-D	ARE	AAACCA	1212	6	+	Zea mays	cis-acting regulatory element essential for the anaerobic induction
GhPRX13-D	LTR	CCGAAA	115	6	+	Hordeum vulgare	cis-acting element involved in low-temperature responsiveness
GhPRX13-D	MBS	CAACTG	319	6	-	Arabidopsis thaliana	MYB binding site involved in drought-inducibility
GhPRX13-D	MYC	CAATTG	109	6	+	Arabidopsis thaliana	necessary for induction in dehydrated plants
GhPRX13-D	MYC	CATTTG	774	6	+	Arabidopsis thaliana	necessary for induction in dehydrated plants
GhPRX13-D	MYC	CATTTG	814	6	+	Arabidopsis thaliana	necessary for induction in dehydrated plants
GhPRX13-D	MYC	CAATTG	1344	6	-	Arabidopsis thaliana	necessary for induction in dehydrated plants
GhPRX13-D	Myc	TCTCTTA	1429	7	+	Arabidopsis thaliana	necessary for induction in dehydrated plants
GhPRX13-D	STRE	AGGGG	17	5	+	Arabidopsis thaliana	activation by heat shock, osmotic stress, low pH, nutrient starvation
GhPRX13-D	STRE	AGGGG	39	5	+	Arabidopsis thaliana	activation by heat shock, osmotic stress, low pH, nutrient starvation
GhPRX13-D	STRE	AGGGG	1335	5	+	Arabidopsis thaliana	activation by heat shock, osmotic stress, low pH, nutrient starvation
GhPRX13-D	STRE	AGGGG	1394	5	-	Arabidopsis thaliana	activation by heat shock, osmotic stress, low pH, nutrient starvation
GhPRX13-D	WUN-motif	AAATTACTA	1163	9	-	Nicotiana glutinosa	wound-responsive element
GhPRX13-D	WUN-motif	AAATTACT	1164	8	-	Nicotiana glutinosa	wound-responsive element
GhPRX13-D	ABRE	CGTACGTGCA	1197	9	-	Hordeum vulgare	cis-acting element involved in the abscisic acid responsiveness
GhPRX13-D	ABRE	ACGTG	1199	5	-	Arabidopsis thaliana	cis-acting element involved in the abscisic acid responsiveness
GhPRX13-D	ERE	ATTTCATA	259	8	+	Nicotiana glutinos	Ethylene-responsive element (ERE) in opposite strand
GhPRX13-D	ERE	ATTTTAAA	368	8	-	Nicotiana glutinos	Ethylene-responsive element (ERE) in opposite strand
GhPRX13-D	TCA-element	CCATCTTTTT	130	9	+	Nicotiana tabacum	cis-acting element involved in salicylic acid responsiveness
GhPRX13-D	CAT-box	GCCACT	672	6	-	Arabidopsis thaliana	cis-acting regulatory element related to meristem expression
GhPRX13-D	GCN4_motif	TGAGTCA	835	7	+	Oryza sativa	cis-regulatory element involved in endosperm expression
GhPRX13-D	MBSI	TTTTTACGGTTA	1171	11	-	Petunia hybrida	MYB binding site involved in flavonoid biosynthetic genes regulation
GhPRX13-D	Myb	CAACTG	319	6	-	Arabidopsis thaliana	Myb protein binding sequence
GhPRX13-D	MYB	TAACCA	1408	6	+	Arabidopsis thaliana	Myb protein binding sequence
GhPRX13-D	AE-box	AGAAACAA	959	8	-	Arabidopsis thaliana	part of a module for light response
GhPRX13-D	Box 4	ATTAAT	327	6	+	Petroselinum crispum	part of a conserved DNA module involved in light responsiveness
GhPRX13-D	chs-CMA1a	TTACTTAA	951	8	-	Daucus carota	part of a light responsive element
GhPRX13-D	GA-motif	ATAGATAA	1233	8	+	Arabidopsis thaliana	part of a light responsive element
GhPRX13-D	G-box	TACGTG	1199	6	-	Arabidopsis thaliana	cis-acting regulatory element involved in light responsiveness
GhPRX13-D	GT1-motif	GGTTAA	1170	6	-	Arabidopsis thaliana	light responsive element
GhPRX13-D	Sp1	GGGCGG	635	6	+	Oryza sativa	light responsive element
GhPRX14-D	ARE	AAACCA	241	6	+	Zea mays	cis-acting regulatory element essential for the anaerobic induction
GhPRX14-D	Myc	TCTCTTA	1159	7	+	Arabidopsis thaliana	necessary for induction in dehydrated plants
GhPRX14-D	MYC	CATTTG	837	6	-	Arabidopsis thaliana	necessary for induction in dehydrated plants
GhPRX14-D	MYC	CATTTG	1396	6	+	Arabidopsis thaliana	necessary for induction in dehydrated plants
GhPRX14-D	TC-rich repeats	ATTCTCTAAC	359	9	+	Nicotiana tabacum	cis-acting element involved in defense and stress responsiveness
GhPRX14-D	WUN-motif	AAATTACTA	1069	9	+	Nicotiana glutinosa	wound-responsive element
GhPRX14-D	ABRE	ACGTG	211	5	+	Arabidopsis thaliana	cis-acting element involved in the abscisic acid responsiveness
GhPRX14-D	CGTCA-motif	CGTCA	635	5	-	Hordeum vulgare	cis-acting regulatory element involved in the MeJA-responsiveness
GhPRX14-D	ERE	ATTTTAAA	757	8	-	Nicotiana glutinos	Ethylene-responsive element (ERE) in opposite strand
GhPRX14-D	ERE	ATTTCATA	983	8	-	Nicotiana glutinos	Ethylene-responsive element (ERE) in opposite strand
GhPRX14-D	ERE	ATTTTAAA	1087	8	+	Nicotiana glutinos	Ethylene-responsive element (ERE) in opposite strand
GhPRX14-D	ERE	ATTTTAAA	1186	8	-	Nicotiana glutinos	Ethylene-responsive element (ERE) in opposite strand
GhPRX14-D	ERE	ATTTTAAA	1291	8	+	Nicotiana glutinos	Ethylene-responsive element (ERE) in opposite strand
GhPRX14-D	TCA-element	CCATCTTTTT	290	9	-	Nicotiana tabacum	cis-acting element involved in salicylic acid responsiveness
GhPRX14-D	TGACG-motif	TGACG	635	5	+	Hordeum vulgare	cis-acting regulatory element involved in the MeJA-responsiveness
GhPRX14-D	GCN4_motif	TGAGTCA	544	7	+	Oryza sativa	cis-regulatory element involved in endosperm expression
GhPRX14-D	MYB	CAACAG	1480	6	+	Arabidopsis thaliana	Myb protein binding sequence
GhPRX14-D	AE-box	AGAAACAA	1433	8	+	Arabidopsis thaliana	part of a module for light response
GhPRX14-D	Box 4	ATTAAT	699	6	+	Petroselinum crispum	part of a conserved DNA module involved in light responsiveness
GhPRX14-D	Box 4	ATTAAT	1198	6	-	Petroselinum crispum	part of a conserved DNA module involved in light responsiveness
GhPRX14-D	chs-CMA1a	TTACTTAA	956	8	+	Daucus carota	part of a light responsive element
GhPRX14-D	GATA-motif	AAGATAAGATT	916	10	-	Arabidopsis thaliana	part of a light responsive element
GhPRX14-D	G-Box	CACGTT	210	6	-	Pisum sativum	cis-acting regulatory element involved in light responsiveness
GhPRX14-D	LAMP-element	CTTTATCA	1006	8	+	Pisum sativum	part of a light responsive element
GhPRX14-D	MRE	AACCTAA	321	7	+	Petroselinum crispum	MYB binding site involved in light responsiveness
GhPRX14-D	MRE	AACCTAA	629	7	-	Petroselinum crispum	MYB binding site involved in light responsiveness
GhPRX15-D	ARE	AAACCA	593	6	-	Zea mays	cis-acting regulatory element essential for the anaerobic induction
GhPRX15-D	ARE	AAACCA	768	6	+	Zea mays	cis-acting regulatory element essential for the anaerobic induction
GhPRX15-D	MBS	CAACTG	1464	6	-	Arabidopsis thaliana	MYB binding site involved in drought-inducibility
GhPRX15-D	MYC	CAATTG	58	6	+	Arabidopsis thaliana	necessary for induction in dehydrated plants
GhPRX15-D	MYC	CATTTG	118	6	-	Arabidopsis thaliana	necessary for induction in dehydrated plants
GhPRX15-D	MYC	CATTTG	226	6	-	Arabidopsis thaliana	necessary for induction in dehydrated plants
GhPRX15-D	MYC	CAATTG	495	6	+	Arabidopsis thaliana	necessary for induction in dehydrated plants
GhPRX15-D	TC-rich repeats	GTTTTCTTAC	3	9	+	Nicotiana tabacum	cis-acting element involved in defense and stress responsiveness
GhPRX15-D	ABRE	ACGTG	862	5	-	Arabidopsis thaliana	cis-acting element involved in the abscisic acid responsiveness
GhPRX15-D	ABRE	ACGTG	1339	5	+	Arabidopsis thaliana	cis-acting element involved in the abscisic acid responsiveness
GhPRX15-D	ABRE	ACGTG	1391	5	-	Arabidopsis thaliana	cis-acting element involved in the abscisic acid responsiveness
GhPRX15-D	AuxRR-core	GGTCCAT	983	7	+	Nicotiana tabacum	cis-acting regulatory element involved in auxin responsiveness
GhPRX15-D	ERE	ATTTTAAA	247	8	+	Nicotiana glutinos	Ethylene-responsive element (ERE) in opposite strand
GhPRX15-D	AT-rich element	ATAGAAATCAA	544	10	+	Glycine max	binding site of AT-rich DNA binding protein (ATBP-1)
GhPRX15-D	Myb	CAACTG	1464	6	-	Arabidopsis thaliana	Myb protein binding sequence
GhPRX15-D	MYB	TAACCA	1116	6	-	Arabidopsis thaliana	Myb protein binding sequence
GhPRX15-D	MYB	CAACAG	1461	6	+	Arabidopsis thaliana	Myb protein binding sequence
GhPRX15-D	ATCT-motif	AATCTAATCC	807	9	-	Pisum sativum	part of a conserved DNA module involved in light responsiveness
GhPRX15-D	Box 4	ATTAAT	428	6	+	Petroselinum crispum	part of a conserved DNA module involved in light responsiveness
GhPRX15-D	Box 4	ATTAAT	511	6	+	Petroselinum crispum	part of a conserved DNA module involved in light responsiveness
GhPRX15-D	Box 4	ATTAAT	650	6	+	Petroselinum crispum	part of a conserved DNA module involved in light responsiveness
GhPRX15-D	Box 4	ATTAAT	876	6	-	Petroselinum crispum	part of a conserved DNA module involved in light responsiveness
GhPRX15-D	Box 4	ATTAAT	912	6	-	Petroselinum crispum	part of a conserved DNA module involved in light responsiveness
GhPRX15-D	CAG-motif	GAAAGGCAGAC	1330	10	+	Arabidopsis thaliana	part of a light response element
GhPRX15-D	G-Box	CACGTT	862	6	+	Pisum sativum	cis-acting regulatory element involved in light responsiveness
GhPRX15-D	G-box	CAGACGTGGCA	1336	10	+	Nicotiana plumbaginifolia	cis-acting regulatory element involved in light responsiveness
GhPRX15-D	G-box	CACGTC	1338	6	-	Zea mays	cis-acting regulatory element involved in light responsiveness
GhPRX15-D	G-box	CCACGTAA	1390	8	+	Brassica napus	cis-acting regulatory element involved in light responsiveness
GhPRX15-D	G-box	TACGTG	1391	6	-	Arabidopsis thaliana	cis-acting regulatory element involved in light responsiveness
GhPRX15-D	GT1-motif	GGTTAAT	1238	7	-	Avena sativa	light responsive element
GhPRX15-D	GT1-motif	GGTTAA	1239	6	-	Arabidopsis thaliana	light responsive element
GrPRX6	ARE	AAACCA	1279	6	+	Zea mays	cis-acting regulatory element essential for the anaerobic induction
GrPRX6	Myc	TCTCTTA	111	7	-	Arabidopsis thaliana	necessary for induction in dehydrated plants
GrPRX6	MYC	CATGTG	1005	6	+	Arabidopsis thaliana	necessary for induction in dehydrated plants
GrPRX6	MYC	CATGTG	1181	6	-	Arabidopsis thaliana	necessary for induction in dehydrated plants
GrPRX6	MYC	CAATTG	1365	6	-	Arabidopsis thaliana	necessary for induction in dehydrated plants
GrPRX6	ERE	ATTTTAAA	269	8	-	Nicotiana glutinos	Ethylene-responsive element (ERE) in opposite strand
GrPRX6	ERE	ATTTTAAA	1091	8	-	Nicotiana glutinos	Ethylene-responsive element (ERE) in opposite strand
GrPRX6	P-box	CCTTTTG	1440	7	-	Oryza sativa	gibberellin-responsive element
GrPRX6	MYB	TAACCA	1436	6	+	Arabidopsis thaliana	Myb protein binding sequence
GrPRX6	MYB	CAACCA	1492	6	-	Arabidopsis thaliana	Myb protein binding sequence
GrPRX6	Box 4	ATTAAT	383	6	+	Petroselinum crispum	part of a conserved DNA module involved in light responsiveness
GrPRX6	GT1-motif	GGTTAA	1435	6	-	Arabidopsis thaliana	light responsive element
GrPRX6	I-box	TGATAATGT	1456	9	-	Solanum tuberosum	part of a light responsive element
GrPRX6	TCT-motif	TCTTAC	1077	6	+	Arabidopsis thaliana	part of a light responsive element
GrPRX7	DRE1	ACCGAGA	203	7	-	Zea mays	drought responsive element 2
GrPRX7	MBS	CAACTG	178	6	-	Arabidopsis thaliana	MYB binding site involved in drought-inducibility
GrPRX7	MYC	CATTTG	95	6	-	Arabidopsis thaliana	necessary for induction in dehydrated plants
GrPRX7	STRE	AGGGG	74	5	+	Arabidopsis thaliana	activation by heat shock, osmotic stress, low pH, nutrient starvation
GrPRX7	STRE	AGGGG	473	5	-	Arabidopsis thaliana	activation by heat shock, osmotic stress, low pH, nutrient starvation
GrPRX7	ABRE	ACGTG	390	5	+	Arabidopsis thaliana	cis-acting element involved in the abscisic acid responsiveness
GrPRX7	ABRE	ACGTG	905	5	-	Arabidopsis thaliana	cis-acting element involved in the abscisic acid responsiveness
GrPRX7	ABRE	ACGTG	1407	5	-	Arabidopsis thaliana	cis-acting element involved in the abscisic acid responsiveness
GrPRX7	ERE	ATTTTAAA	693	8	+	Nicotiana glutinos	Ethylene-responsive element (ERE) in opposite strand
GrPRX7	ERE	ATTTTAAA	835	8	+	Nicotiana glutinos	Ethylene-responsive element (ERE) in opposite strand
GrPRX7	ERE	ATTTTAAA	919	8	+	Nicotiana glutinos	Ethylene-responsive element (ERE) in opposite strand
GrPRX7	TGA-element	AACGAC	434	6	-	Brassica oleracea	auxin-responsive element
GrPRX7	circadian	CAAAGATATC	195	9	+	Lycopersicon esculentum	cis-acting regulatory element involved in circadian control
GrPRX7	GCN4_motif	TGAGTCA	802	7	-	Oryza sativa	cis-regulatory element involved in endosperm expression
GrPRX7	Myb	CAACTG	178	6	-	Arabidopsis thaliana	Myb protein binding sequence
GrPRX7	MYB	TAACCA	746	6	-	Arabidopsis thaliana	Myb protein binding sequence
GrPRX7	AE-box	AGAAACAA	777	8	-	Arabidopsis thaliana	part of a module for light response
GrPRX7	Box 4	ATTAAT	258	6	+	Petroselinum crispum	part of a conserved DNA module involved in light responsiveness
GrPRX7	Box 4	ATTAAT	636	6	+	Petroselinum crispum	part of a conserved DNA module involved in light responsiveness
GrPRX7	Box 4	ATTAAT	1023	6	-	Petroselinum crispum	part of a conserved DNA module involved in light responsiveness
GrPRX7	G-Box	CACGTT	389	6	-	Pisum sativum	cis-acting regulatory element involved in light responsiveness
GrPRX7	G-Box	CACGTT	905	6	+	Pisum sativum	cis-acting regulatory element involved in light responsiveness
GrPRX7	G-Box	CACGTT	1407	6	+	Pisum sativum	cis-acting regulatory element involved in light responsiveness
GrPRX7	GT1-motif	GGTTAAT	747	7	+	Avena sativa	light responsive element
GrPRX7	GT1-motif	GGTTAAT	1265	7	-	Avena sativa	light responsive element
GrPRX7	GT1-motif	GGTTAA	1266	6	-	Arabidopsis thaliana	light responsive element
GrPRX8	ARE	AAACCA	754	6	+	Zea mays	cis-acting regulatory element essential for the anaerobic induction
GrPRX8	ARE	AAACCA	1377	6	+	Zea mays	cis-acting regulatory element essential for the anaerobic induction
GrPRX8	LTR	CCGAAA	283	6	+	Hordeum vulgare	cis-acting element involved in low-temperature responsiveness
GrPRX8	MBS	CAACTG	487	6	-	Arabidopsis thaliana	MYB binding site involved in drought-inducibility
GrPRX8	MYC	CAATTG	277	6	+	Arabidopsis thaliana	necessary for induction in dehydrated plants
GrPRX8	MYC	CATTTG	942	6	+	Arabidopsis thaliana	necessary for induction in dehydrated plants
GrPRX8	MYC	CATTTG	982	6	+	Arabidopsis thaliana	necessary for induction in dehydrated plants
GrPRX8	STRE	AGGGG	185	5	+	Arabidopsis thaliana	activation by heat shock, osmotic stress, low pH, nutrient starvation
GrPRX8	STRE	AGGGG	207	5	+	Arabidopsis thaliana	activation by heat shock, osmotic stress, low pH, nutrient starvation
GrPRX8	WUN-motif	CCATTTCAA	72	9	-	Nicotiana glutinosa	wound-responsive element
GrPRX8	WUN-motif	AAATTACTA	1328	9	-	Nicotiana glutinosa	wound-responsive element
GrPRX8	WUN-motif	AAATTACT	1329	8	-	Nicotiana glutinosa	wound-responsive element
GrPRX8	ABRE	CGTACGTGCA	1362	9	-	Hordeum vulgare	cis-acting element involved in the abscisic acid responsiveness
GrPRX8	ABRE	ACGTG	1364	5	-	Arabidopsis thaliana	cis-acting element involved in the abscisic acid responsiveness
GrPRX8	ERE	ATTTCATA	427	8	+	Nicotiana glutinos	Ethylene-responsive element (ERE) in opposite strand
GrPRX8	ERE	ATTTTAAA	536	8	-	Nicotiana glutinos	Ethylene-responsive element (ERE) in opposite strand
GrPRX8	TCA-element	CCATCTTTTT	298	9	+	Nicotiana tabacum	cis-acting element involved in salicylic acid responsiveness
GrPRX8	CAT-box	GCCACT	840	6	-	Arabidopsis thaliana	cis-acting regulatory element related to meristem expression
GrPRX8	GCN4_motif	TGAGTCA	1003	7	+	Oryza sativa	cis-regulatory element involved in endosperm expression
GrPRX8	MBSI	TTTTTACGGTTA	1336	11	-	Petunia hybrida	MYB binding site involved in flavonoid biosynthetic genes regulation
GrPRX8	Myb	CAACTG	487	6	-	Arabidopsis thaliana	Myb protein binding sequence
GrPRX8	AE-box	AGAAACAA	1127	8	-	Arabidopsis thaliana	part of a module for light response
GrPRX8	Box 4	ATTAAT	495	6	+	Petroselinum crispum	part of a conserved DNA module involved in light responsiveness
GrPRX8	chs-CMA1a	TTACTTAA	48	8	-	Daucus carota	part of a light responsive element
GrPRX8	chs-CMA1a	TTACTTAA	1119	8	-	Daucus carota	part of a light responsive element
GrPRX8	GA-motif	ATAGATAA	1398	8	+	Arabidopsis thaliana	part of a light responsive element
GrPRX8	G-box	TACGTG	1364	6	-	Arabidopsis thaliana	cis-acting regulatory element involved in light responsiveness
GrPRX8	GT1-motif	GGTTAA	61	6	+	Arabidopsis thaliana	light responsive element
GrPRX8	GT1-motif	GGTTAA	1335	6	-	Arabidopsis thaliana	light responsive element
GrPRX8	Sp1	GGGCGG	803	6	+	Oryza sativa	light responsive element
GrPRX3	ARE	AAACCA	47	6	+	Zea mays	cis-acting regulatory element essential for the anaerobic induction
GrPRX3	ARE	AAACCA	1329	6	-	Zea mays	cis-acting regulatory element essential for the anaerobic induction
GrPRX3	DRE1	ACCGAGA	1166	7	+	Zea mays	drought responsive element 3
GrPRX3	MBS	CAACTG	1015	6	+	Arabidopsis thaliana	MYB binding site involved in drought-inducibility
GrPRX3	MYC	CATTTG	386	6	+	Arabidopsis thaliana	necessary for induction in dehydrated plants
GrPRX3	MYC	CAATTG	1352	6	-	Arabidopsis thaliana	necessary for induction in dehydrated plants
GrPRX3	WRE3	CCACCT	1173	6	-	Pisum sativum	wound inducibility (third region)
GrPRX3	WUN-motif	AAATTACT	875	8	+	Nicotiana glutinosa	wound-responsive element
GrPRX3	ABRE	CGTACGTGCA	464	9	+	Hordeum vulgare	cis-acting element involved in the abscisic acid responsiveness
GrPRX3	CGTCA-motif	CGTCA	279	5	+	Hordeum vulgare	cis-acting regulatory element involved in the MeJA-responsiveness
GrPRX3	ERE	ATTTCATA	814	8	-	Nicotiana glutinos	Ethylene-responsive element (ERE) in opposite strand
GrPRX3	P-box	CCTTTTG	484	7	+	Oryza sativa	gibberellin-responsive element
GrPRX3	TGACG-motif	TGACG	279	5	-	Hordeum vulgare	cis-acting regulatory element involved in the MeJA-responsiveness
GrPRX3	AT-rich element	ATAGAAATCAA	600	10	-	Glycine max	binding site of AT-rich DNA binding protein (ATBP-1)
GrPRX3	Myb	TAACTG	109	6	+	Arabidopsis thaliana	Myb protein binding sequence
GrPRX3	Myb	CAACTG	1015	6	+	Arabidopsis thaliana	Myb protein binding sequence
GrPRX3	Myb	TAACTG	1425	6	+	Arabidopsis thaliana	Myb protein binding sequence
GrPRX3	MYB	CAACCA	851	6	-	Arabidopsis thaliana	Myb protein binding sequence
GrPRX3	MYB	CAACAG	1101	6	-	Arabidopsis thaliana	Myb protein binding sequence
GrPRX3	MYB	CAACAG	1428	6	-	Arabidopsis thaliana	Myb protein binding sequence
GrPRX3	MYB	CAACCA	1450	6	-	Arabidopsis thaliana	Myb protein binding sequence
GrPRX3	GATA-motif	GATAGGA	883	7	+	Arabidopsis thaliana	part of a light responsive element
GrPRX3	GATA-motif	AAGATAAGATT	1181	10	+	Arabidopsis thaliana	part of a light responsive element
GrPRX3	GATA-motif	GATAGGA	1198	7	+	Arabidopsis thaliana	part of a light responsive element
GrPRX3	GT1-motif	GGTTAA	21	6	-	Arabidopsis thaliana	light responsive element
GrPRX3	LAMP-element	CTTTATCA	724	8	+	Pisum sativum	part of a light responsive element
GrPRX1	ARE	AAACCA	62	6	-	Zea mays	cis-acting regulatory element essential for the anaerobic induction
GrPRX1	ARE	AAACCA	593	6	+	Zea mays	cis-acting regulatory element essential for the anaerobic induction
GrPRX1	ARE	AAACCA	1112	6	+	Zea mays	cis-acting regulatory element essential for the anaerobic induction
GrPRX1	MBS	CAACTG	13	6	-	Arabidopsis thaliana	MYB binding site involved in drought-inducibility
GrPRX1	MYC	CATTTG	175	6	-	Arabidopsis thaliana	necessary for induction in dehydrated plants
GrPRX1	MYC	CATTTG	1018	6	+	Arabidopsis thaliana	necessary for induction in dehydrated plants
GrPRX1	TC-rich repeats	GTTTTCTTAC	320	9	+	Nicotiana tabacum	cis-acting element involved in defense and stress responsiveness
GrPRX1	TC-rich repeats	GTTTTCTTAC	919	9	+	Nicotiana tabacum	cis-acting element involved in defense and stress responsiveness
GrPRX1	WRE3	CCACCT	1087	6	-	Pisum sativum	wound inducibility (third region)
GrPRX1	AuxRR-core	GGTCCAT	349	7	-	Nicotiana tabacum	cis-acting regulatory element involved in auxin responsiveness
GrPRX1	AuxRR-core	GGTCCAT	1186	7	-	Nicotiana tabacum	cis-acting regulatory element involved in auxin responsiveness
GrPRX1	CGTCA-motif	CGTCA	995	5	+	Hordeum vulgare	cis-acting regulatory element involved in the MeJA-responsiveness
GrPRX1	P-box	CCTTTTG	223	7	-	Oryza sativa	gibberellin-responsive element
GrPRX1	TCA-element	TCAGAAGAGG	149	9	-	Brassica oleracea	cis-acting element involved in salicylic acid responsiveness
GrPRX1	TCA-element	CCATCTTTTT	675	9	+	Nicotiana tabacum	cis-acting element involved in salicylic acid responsiveness
GrPRX1	TGACG-motif	TGACG	995	5	-	Hordeum vulgare	cis-acting regulatory element involved in the MeJA-responsiveness
GrPRX1	TGA-element	AACGAC	944	6	-	Brassica oleracea	auxin-responsive element
GrPRX1	HD-Zip 1	CAAT(A/T)ATTG	1135	8.5	-	Arabidopsis thaliana	element involved in differentiation of the palisade mesophyll cells
GrPRX1	Myb	CAACTG	13	6	-	Arabidopsis thaliana	Myb protein binding sequence
GrPRX1	MYB	CAACAG	521	6	-	Arabidopsis thaliana	Myb protein binding sequence
GrPRX1	GATA-motif	GATAGGA	868	7	+	Arabidopsis thaliana	part of a light responsive element
GrPRX1	GT1-motif	GGTTAA	423	6	+	Arabidopsis thaliana	light responsive element
GrPRX2	ARE	AAACCA	765	6	-	Zea mays	cis-acting regulatory element essential for the anaerobic induction
GrPRX2	LTR	CCGAAA	1200	6	-	Hordeum vulgare	cis-acting element involved in low-temperature responsiveness
GrPRX2	MYC	CATTTG	26	6	+	Arabidopsis thaliana	necessary for induction in dehydrated plants
GrPRX2	MYC	CATGTG	352	6	-	Arabidopsis thaliana	necessary for induction in dehydrated plants
GrPRX2	MYC	CATTTG	642	6	-	Arabidopsis thaliana	necessary for induction in dehydrated plants
GrPRX2	MYC	CATTTG	1065	6	+	Arabidopsis thaliana	necessary for induction in dehydrated plants
GrPRX2	MYC	CATTTG	1118	6	+	Arabidopsis thaliana	necessary for induction in dehydrated plants
GrPRX2	MYC	CATTTG	1427	6	-	Arabidopsis thaliana	necessary for induction in dehydrated plants
GrPRX2	TC-rich repeats	ATTCTCTAAC	132	9	+	Nicotiana tabacum	cis-acting element involved in defense and stress responsiveness
GrPRX2	WRE3	CCACCT	319	6	+	Pisum sativum	wound inducibility (third region)
GrPRX2	ABRE	GACACGTACGT	16	10	-	Oryza sativa	cis-acting element involved in the abscisic acid responsiveness
GrPRX2	ERE	ATTTTAAA	825	8	+	Nicotiana glutinos	Ethylene-responsive element (ERE) in opposite strand
GrPRX2	ERE	ATTTCATA	936	8	-	Nicotiana glutinos	Ethylene-responsive element (ERE) in opposite strand
GrPRX2	ERE	ATTTTAAA	948	8	+	Nicotiana glutinos	Ethylene-responsive element (ERE) in opposite strand
GrPRX2	ERE	ATTTTAAA	1014	8	+	Nicotiana glutinos	Ethylene-responsive element (ERE) in opposite strand
GrPRX2	ERE	ATTTTAAA	1075	8	+	Nicotiana glutinos	Ethylene-responsive element (ERE) in opposite strand
GrPRX2	ERE	ATTTTAAA	1249	8	+	Nicotiana glutinos	Ethylene-responsive element (ERE) in opposite strand
GrPRX2	Myb	TAACTG	490	6	-	Arabidopsis thaliana	Myb protein binding sequence
GrPRX2	MYB	TAACCA	316	6	+	Arabidopsis thaliana	Myb protein binding sequence
GrPRX2	ATC-motif	AGCTATCCA	288	9	-	Arabidopsis thaliana	part of a conserved DNA module involved in light responsiveness
GrPRX2	Box 4	ATTAAT	974	6	-	Petroselinum crispum	part of a conserved DNA module involved in light responsiveness
GrPRX2	Box 4	ATTAAT	1102	6	-	Petroselinum crispum	part of a conserved DNA module involved in light responsiveness
GrPRX2	GT1-motif	GGTTAAT	314	7	-	Avena sativa	light responsive element
GrPRX2	GT1-motif	GGTTAA	315	6	-	Arabidopsis thaliana	light responsive element
GrPRX2	TCT-motif	TCTTAC	186	6	+	Arabidopsis thaliana	part of a light responsive element
GrPRX4	ARE	AAACCA	417	6	+	Zea mays	cis-acting regulatory element essential for the anaerobic induction
GrPRX4	LTR	CCGAAA	492	6	+	Hordeum vulgare	cis-acting element involved in low-temperature responsiveness
GrPRX4	Myc	TCTCTTA	1332	7	+	Arabidopsis thaliana	necessary for induction in dehydrated plants
GrPRX4	MYC	CATGTG	18	6	-	Arabidopsis thaliana	necessary for induction in dehydrated plants
GrPRX4	MYC	CAATTG	77	6	+	Arabidopsis thaliana	necessary for induction in dehydrated plants
GrPRX4	MYC	CATTTG	1013	6	-	Arabidopsis thaliana	necessary for induction in dehydrated plants
GrPRX4	TC-rich repeats	ATTCTCTAAC	535	9	+	Nicotiana tabacum	cis-acting element involved in defense and stress responsiveness
GrPRX4	WUN-motif	AAATTACTA	1242	9	+	Nicotiana glutinosa	wound-responsive element
GrPRX4	ABRE	ACGTG	387	5	+	Arabidopsis thaliana	cis-acting element involved in the abscisic acid responsiveness
GrPRX4	CGTCA-motif	CGTCA	811	5	-	Hordeum vulgare	cis-acting regulatory element involved in the MeJA-responsiveness
GrPRX4	ERE	ATTTTAAA	933	8	-	Nicotiana glutinos	Ethylene-responsive element (ERE) in opposite strand
GrPRX4	ERE	ATTTCATA	1156	8	-	Nicotiana glutinos	Ethylene-responsive element (ERE) in opposite strand
GrPRX4	ERE	ATTTTAAA	1260	8	+	Nicotiana glutinos	Ethylene-responsive element (ERE) in opposite strand
GrPRX4	ERE	ATTTTAAA	1359	8	-	Nicotiana glutinos	Ethylene-responsive element (ERE) in opposite strand
GrPRX4	TCA-element	CCATCTTTTT	466	9	-	Nicotiana tabacum	cis-acting element involved in salicylic acid responsiveness
GrPRX4	TGACG-motif	TGACG	811	5	+	Hordeum vulgare	cis-acting regulatory element involved in the MeJA-responsiveness
GrPRX4	Myb	TAACTG	684	6	+	Arabidopsis thaliana	Myb protein binding sequence
GrPRX4	Box 4	ATTAAT	875	6	-	Petroselinum crispum	part of a conserved DNA module involved in light responsiveness
GrPRX4	Box 4	ATTAAT	1371	6	-	Petroselinum crispum	part of a conserved DNA module involved in light responsiveness
GrPRX4	chs-CMA1a	TTACTTAA	1129	8	+	Daucus carota	part of a light responsive element
GrPRX4	GATA-motif	AAGATAAGATT	1092	10	-	Arabidopsis thaliana	part of a light responsive element
GrPRX4	G-Box	TCCACATGGCA	16	10	+	Triticum aestivum	cis-acting regulatory element involved in light responsiveness
GrPRX4	G-Box	CACGTT	386	6	-	Pisum sativum	cis-acting regulatory element involved in light responsiveness
GrPRX4	G-box	GCCACGTGGA	16	9	-	Arabidopsis thaliana	cis-acting regulatory element involved in light responsiveness
GrPRX4	LAMP-element	CTTTATCA	1179	8	+	Pisum sativum	part of a light responsive element
GrPRX4	MRE	AACCTAA	805	7	-	Petroselinum crispum	MYB binding site involved in light responsiveness
GrPRX5	ARE	AAACCA	731	6	+	Zea mays	cis-acting regulatory element essential for the anaerobic induction
GrPRX5	ARE	AAACCA	776	6	-	Zea mays	cis-acting regulatory element essential for the anaerobic induction
GrPRX5	MYC	CAATTG	243	6	+	Arabidopsis thaliana	necessary for induction in dehydrated plants
GrPRX5	MYC	CATTTG	302	6	-	Arabidopsis thaliana	necessary for induction in dehydrated plants
GrPRX5	MYC	CATTTG	410	6	-	Arabidopsis thaliana	necessary for induction in dehydrated plants
GrPRX5	MYC	CAATTG	422	6	+	Arabidopsis thaliana	necessary for induction in dehydrated plants
GrPRX5	MYC	CAATTG	678	6	+	Arabidopsis thaliana	necessary for induction in dehydrated plants
GrPRX5	TC-rich repeats	GTTTTCTTAC	188	9	+	Nicotiana tabacum	cis-acting element involved in defense and stress responsiveness
GrPRX5	TC-rich repeats	GTTTTCTTAC	1141	9	-	Nicotiana tabacum	cis-acting element involved in defense and stress responsiveness
GrPRX5	ABRE	ACGTG	1045	5	-	Arabidopsis thaliana	cis-acting element involved in the abscisic acid responsiveness
GrPRX5	ABRE	ACGTG	1461	5	+	Arabidopsis thaliana	cis-acting element involved in the abscisic acid responsiveness
GrPRX5	AuxRR-core	GGTCCAT	1175	7	+	Nicotiana tabacum	cis-acting regulatory element involved in auxin responsiveness
GrPRX5	ERE	ATTTCATA	25	8	+	Nicotiana glutinos	Ethylene-responsive element (ERE) in opposite strand
GrPRX5	ERE	ATTTTAAA	431	8	+	Nicotiana glutinos	Ethylene-responsive element (ERE) in opposite strand
GrPRX5	ERE	ATTTTAAA	636	8	-	Nicotiana glutinos	Ethylene-responsive element (ERE) in opposite strand
GrPRX5	HD-Zip 1	CAAT(A/T)ATTG	840	8.5	-	Arabidopsis thaliana	element involved in differentiation of the palisade mesophyll cells
GrPRX5	ATCT-motif	AATCTAATCC	990	9	-	Pisum sativum	part of a conserved DNA module involved in light responsiveness
GrPRX5	ATCT-motif	AATCTAATCC	1332	9	-	Pisum sativum	part of a conserved DNA module involved in light responsiveness
GrPRX5	Box 4	ATTAAT	611	6	+	Petroselinum crispum	part of a conserved DNA module involved in light responsiveness
GrPRX5	Box 4	ATTAAT	694	6	+	Petroselinum crispum	part of a conserved DNA module involved in light responsiveness
GrPRX5	Box 4	ATTAAT	833	6	-	Petroselinum crispum	part of a conserved DNA module involved in light responsiveness
GrPRX5	Box 4	ATTAAT	1059	6	-	Petroselinum crispum	part of a conserved DNA module involved in light responsiveness
GrPRX5	Box 4	ATTAAT	1095	6	-	Petroselinum crispum	part of a conserved DNA module involved in light responsiveness
GrPRX5	CAG-motif	GAAAGGCAGAC	1452	10	+	Arabidopsis thaliana	part of a light response element
GrPRX5	G-Box	CACGTT	1045	6	+	Pisum sativum	cis-acting regulatory element involved in light responsiveness
GrPRX5	G-box	CAGACGTGGCA	1458	10	+	Nicotiana plumbaginifolia	cis-acting regulatory element involved in light responsiveness
GrPRX5	G-box	CACGTC	1460	6	-	Zea mays	cis-acting regulatory element involved in light responsiveness
GrPRX5	GT1-motif	GGTTAA	153	6	+	Arabidopsis thaliana	light responsive element
GrPRX5	TCT-motif	TCTTAC	1141	6	-	Arabidopsis thaliana	part of a light responsive element
