# Supplementary material for: Genome-wide identification, evolution, expression, and alternative splicing profiles of peroxiredoxin genes in cotton
Source: PeerJ. 2021 Jan 18;9:e10685. doi: 10.7717/peerj.10685 (PMC7819121; doi:10.7717/peerj.10685)
Supplement: Table S3 [file peerj-09-10685-s008.xlsx]

## Sheet: Table S4
Table S3 All primers used in this study.
Primer name	Sequence (5' to 3')	Used to
GhPRX8-D_F	CCTCTAAATCCCTTCCTTTAAAGC	analyse the relative transcript levels of G.hirsutum PRXs by (q)RT-PCR
GhPRX8-D_R	TTCACCATCGGAATCGAAGTAGGAG
GhPRX1-A_F	CTCCTCCGTTTCTTCCCTTT
GhPRX1-A_R	AACGAACCCAGGGAGGTGTTTC
GhPRX2-A_F	TGAGGTTGTGTAAGCTCGGCT
GhPRX2-A_R	AAAGACTTGCGAGAAGGGGAGGT
GhPRX9-D_F	CCTGAGTTCACAGACCAAAATG
GhPRX9-D_R	CCATAGGCTTTGGCAATTGTCTTT
GhPRX4-A_F	TACTGTCCAAACACTCCGTTAC
GhPRX4-A_R	TTGGATTTCAGCTCCCCT
GhPRX12-D_F	CACTGTCCAAACCCTCGTTTAT
GhPRX12-D_R	GTTCTCAGGGTAAGTTTTGGC
GhPRX6-A_F	GACCAATAACGTAAAGGACTTG
GhPRX6-A_R	ATAACGGATGAGGTTGCTCGCCTT
GhPRX14-D_F	TTAAAGCCAGTCAGGCCCAG
GhPRX14-D_R	CCCAATTCAAGGCTCTG
GhPRX7-A_F	ATTCATTTTCCTCCTCCCAC
GhPRX7-A_R	GTCATGAAGGTTGAATGTTC
GhPRX15-D_F	TTCAGGGAACGAGCTCCCATCT
GhPRX15-D_R	ATGGCGAAATCACTACCGGCTC
GhPRX3-A_F	GTATTGCGGTCGGTGACACGAT
GhPRX3-A_R	GTTTAGCGGCAGCAAGGGAGTA
GhPRX5-A_F	TCTCACACTTCAAAGCCGCAGT
GhPRX5-A_R	ACCACAACAGGCTTCCCTTTAAACT
GhPRX10-D_F	TCCCGGACGGTAGTCTCTCCTA
GhPRX10-D_R	TAACCTGTTTACCGGCAGCGAG
GhPRX11-D_F	TGACACGATTCCCGATGGTACTGT
GhPRX11-D_R	GCCTTTTCAATGAAACCTGGT
GhPRX13-D_F	CACCAAACAGGCGTGTGCTTTT
GhPRX13-D_R	TTTCCTCACCTTGTTGCCCTCG
GhPRX16-D_F	TGTTGGGAATTTGGGAGGTGCAT
GhPRX16-D_R	AGACGGCCTCAGCCTCAAAATC
UBQ-7	GAAGGCATTCCACCTGACCAAC	cotton ubiquitin gene as internal reference control in (q)RT-PCR
UBQ-7	CTTGACCTTCTTCTTCTTGTGCTTG
GhPRX2-A_L	TCTAGAATGGCTTGCTCAGCTACTTC	amplify the CDS of G.hirsutum PRXs without terminator codon
GhPRX2-A_R	GGATCCAATTGCTGCAAAGTAATCC
GhPRX4-A_L	TCTAGAATGGCTCCGATCGCTGTCGG
GhPRX4-A_R	GGATCCAAGAGCTTTAAGGATATC
GhPRX6-A_L	TCTAGAATGGCGTCAACAATTCTAAG
GhPRX6-A_R	GGATCCTATCTGCTCCAAAATAACC
GhPRX9-D_L	TCTAGAATGGCTTGCTCAGCTACTTC
GhPRX9-D_R	GGATCCAATTGCTGCAAAGTAATCC
GhPRX12-D_L	TCTAGAATGGCTCCGATCGCTGTCGG
GhPRX12-D_R	GGATCCAAGAGCTTTAAGGATATC
GhPRX14-D_L	TCTAGAATGGCGTCAACAATTCTTAG
GhPRX14-D_R	GGATCCTATCTGCTCCAAAATAACC
GhPRX8-D_L	GGATCCATGGCAGCAACTTCCTTAAC
GhPRX8-D_R	TTAATTAACAGCACTTTGAGAAT
GhPRX1-A_L	GGATCCATGGCAGCAACTTCCTTAAC
GhPRX1-A_R	TTAATTAACAGCACTTTGAGAAT
GhPRX15-D_L	GGATCCATGCCAGGCCTCACCATTGG
GhPRX15-D_R	TTAATTAAGACGTTAGTGAAGCGC
GhPRX7-A_L	GGATCCATGCCAGGCCTCACCATTGG
GhPRX7-A_R	TTAATTAAGACGTTAGTGAAGCGC
