# Supplementary material for: Genome-wide identification, evolution, expression, and alternative splicing profiles of peroxiredoxin genes in cotton
Source: PeerJ. 2021 Jan 18;9:e10685. doi: 10.7717/peerj.10685 (PMC7819121; doi:10.7717/peerj.10685)
Supplement: Table S4 [file peerj-09-10685-s009.xlsx]

## Sheet: Table S5
Table S4 Prediction of subcellular localization of PRX protein. RC represents Reliability class, from 1 to 5, where 1 indicates the strongest prediction. In the Loc column: C represents Chloroplast. _ indicates any location in the cell except for mitochondria and chloroplasts. * indicates no result.
Name	Len	cTP	mTP	SP	other	Loc	RC
GhPRX15-D	219	0.121	0.113	0.126	0.89	_	2
GhPRX6-A	198	0.249	0.7	0.035	0.016	*	3
GhPRX2-A	265	0.977	0.053	0.004	0.019	C	1
GhPRX9-D	265	0.977	0.05	0.004	0.02	C	1
GhPRX10-D	146	0.081	0.086	0.105	0.887	_	2
GhPRX14-D	198	0.245	0.717	0.036	0.015	*	3
GhPRX11-D	162	0.144	0.071	0.089	0.895	_	2
GhPRX4-A	162	0.066	0.078	0.181	0.897	_	2
GhPRX5-A	216	0.974	0.019	0.018	0.025	C	1
GhPRX8-D	227	0.953	0.101	0.011	0.008	C	1
GhPRX7-A	219	0.113	0.109	0.127	0.895	_	2
GhPRX12-D	162	0.062	0.082	0.179	0.901	_	2
GhPRX13-D	216	0.975	0.021	0.014	0.021	C	1
GhPRX1-A	227	0.948	0.085	0.011	0.009	C	1
GhPRX3-A	162	0.154	0.087	0.079	0.9	_	2
GrPRX2	265	0.977	0.05	0.004	0.02	C	1
GrPRX3	163	0.081	0.086	0.105	0.887	_	2
GrPRX1	162	0.148	0.074	0.091	0.886	_	2
GrPRX8	230	0.975	0.021	0.014	0.021	C	1
GrPRX7	162	0.062	0.082	0.179	0.901	_	2
GrPRX6	227	0.953	0.216	0.005	0.004	C	2
GrPRX4	203	0.253	0.655	0.029	0.02	*	3
GrPRX5	219	0.12	0.114	0.126	0.892	_	2
GaPRX5	227	0.949	0.089	0.011	0.008	C	1
GaPRX4	265	0.977	0.05	0.004	0.02	C	1
GaPRX3	163	0.074	0.077	0.138	0.863	_	2
GaPRX1	162	0.154	0.086	0.065	0.903	_	2
GaPRX7	162	0.062	0.082	0.179	0.901	_	2
GaPRX6	216	0.976	0.019	0.016	0.023	C	1
GaPRX2	198	0.121	0.737	0.054	0.014	*	2
GaPRX8	204	0.113	0.109	0.127	0.895	_	2
GbPRX4-A	227	0.948	0.085	0.011	0.009	C	1
GbPRX10-D	227	0.95	0.09	0.009	0.009	C	1
GbPRX8-D	265	0.975	0.053	0.004	0.021	C	1
GbPRX13-D	146	0.081	0.086	0.105	0.887	_	2
GbPRX11-D	162	0.062	0.082	0.179	0.901	_	2
GbPRX9-D	216	0.975	0.021	0.014	0.021	C	1
GbPRX7-D	198	0.245	0.717	0.036	0.015	*	3
GbPRX14-D	219	0.121	0.113	0.126	0.89	_	2
GbPRX6-A	162	0.154	0.087	0.079	0.9	_	2
GbPRX3-A	162	0.062	0.082	0.179	0.901	_	2
GbPRX2-A	216	0.974	0.019	0.018	0.025	C	1
GbPRX5-A	198	0.249	0.7	0.035	0.016	*	3
GbPRX1-A	219	0.113	0.109	0.127	0.895	_	2
