# Supplementary material for: Genome-wide identification, evolution, expression, and alternative splicing profiles of peroxiredoxin genes in cotton
Source: PeerJ. 2021 Jan 18;9:e10685. doi: 10.7717/peerj.10685 (PMC7819121; doi:10.7717/peerj.10685)
Supplement: Table S5 [file peerj-09-10685-s010.xlsx]

## Sheet: Sheet1
Table S5. Blastp alignment of reference protein database on NCNI with identified PRX proteins (Scor of percent identity >= 90%)
Gene ID	Description	Max Score	Total Score	Query Cover	E value	Per. Ident	Accession
GhPRX15-D	PREDICTED: 1-Cys peroxiredoxin-like [Gossypium hirsutum]	458	458	1	3e-163	1	XP_016700896.1
	PREDICTED: 1-Cys peroxiredoxin [Gossypium raimondii]	453	453	1	2e-161	0.9909	XP_012457278.1
GhPRX6-A	PREDICTED: peroxiredoxin-2F, mitochondrial-like [Gossypium hirsutum]	403	403	1	4e-142	1	XP_016724513.1
	PREDICTED: peroxiredoxin-2F, mitochondrial [Gossypium arboreum]	398	398	1	4e-140	0.9899	XP_017608166.1
	PREDICTED: peroxiredoxin-2F, mitochondrial isoform X2 [Gossypium raimondii]	396	396	1	2e-139	0.9798	XP_012456438.1
	PREDICTED: peroxiredoxin-2F, mitochondrial-like [Gossypium hirsutum]	396	396	1	2e-139	0.9798	XP_016699355.1
	PREDICTED: peroxiredoxin-2F, mitochondrial isoform X1 [Gossypium raimondii]	389	389	1	1e-136	0.9557	XP_012456437.1
GhPRX2-A	PREDICTED: 2-Cys peroxiredoxin BAS1, chloroplastic-like [Gossypium hirsutum]	539	539	1	0	1	XP_016738633.1
	PREDICTED: 2-Cys peroxiredoxin BAS1, chloroplastic [Gossypium raimondii]	534	1068	1	0	0.9849	XP_012441582.1
	PREDICTED: 2-Cys peroxiredoxin BAS1, chloroplastic-like [Gossypium hirsutum]	473	473	0.89	1e-167	0.9873	XP_016679231.1
GhPRX9-D	PREDICTED: 2-Cys peroxiredoxin BAS1, chloroplastic [Gossypium raimondii]	539	1079	1	0	1	XP_012441582.1
	PREDICTED: 2-Cys peroxiredoxin BAS1, chloroplastic-like [Gossypium hirsutum]	534	534	1	0	0.9849	XP_016738633.1
	2-Cys peroxiredoxin BAS1, chloroplastic-like isoform X1 [Durio zibethinus]	484	484	1	4e-172	0.9023	XP_022766982.1
	PREDICTED: 2-Cys peroxiredoxin BAS1, chloroplastic-like [Gossypium hirsutum]	475	475	0.89	2e-168	0.9958	XP_016679231.1
GhPRX10-D	PREDICTED: peroxiredoxin-2B-like [Gossypium hirsutum]	300	300	1	3e-103	1	XP_016689954.1
	PREDICTED: peroxiredoxin-2B-like [Gossypium arboreum]	296	296	1	3e-101	0.9795	XP_017611576.1
	PREDICTED: peroxiredoxin-2B-like [Gossypium hirsutum]	295	591	1	4e-101	0.9795	XP_016750088.1
GhPRX14-D	PREDICTED: peroxiredoxin-2F, mitochondrial-like [Gossypium hirsutum]	402	402	1	6e-142	1	XP_016699355.1
	PREDICTED: peroxiredoxin-2F, mitochondrial isoform X2 [Gossypium raimondii]	399	399	1	1e-140	0.9899	XP_012456438.1
	PREDICTED: peroxiredoxin-2F, mitochondrial-like [Gossypium hirsutum]	396	396	1	2e-139	0.9798	XP_016724513.1
	PREDICTED: peroxiredoxin-2F, mitochondrial isoform X1 [Gossypium raimondii]	393	393	1	4e-138	0.9655	XP_012456437.1
	PREDICTED: peroxiredoxin-2F, mitochondrial [Gossypium arboreum]	390	390	1	2e-137	0.9697	XP_017608166.1
GhPRX11-D	PREDICTED: peroxiredoxin-2B-like isoform X2 [Gossypium hirsutum]	331	331	1	5e-115	1	XP_016684751.1
	PREDICTED: peroxiredoxin-2B-like [Gossypium raimondii]	330	330	1	2e-114	0.9938	XP_012440686.1
	PREDICTED: peroxiredoxin-2B-like [Gossypium hirsutum]	326	326	1	4e-113	0.9815	XP_016702396.1
	PREDICTED: peroxiredoxin-2B-like [Gossypium arboreum]	325	325	1	2e-112	0.9753	XP_017605848.1
	PREDICTED: peroxiredoxin-2B-like isoform X1 [Gossypium hirsutum]	318	318	1	1e-109	0.9	XP_016684749.1
GhPRX4-A	PREDICTED: peroxiredoxin-2B-like [Gossypium hirsutum]	327	327	1	2e-113	1	XP_016720499.1
	PREDICTED: peroxiredoxin-2B [Theobroma cacao]	308	308	1	8e-106	0.9321	XP_007013115.2
	peroxiredoxin-2-like [Durio zibethinus]	308	308	1	1e-105	0.9136	XP_022755025.1
	peroxiredoxin-2 [Durio zibethinus]	308	308	1	1e-105	0.9198	XP_022730045.1
	peroxiredoxin-2 [Citrus sinensis]	298	298	1	4e-102	0.9012	XP_006475658.1
GhPRX5-A	PREDICTED: peroxiredoxin Q, chloroplastic [Gossypium arboreum]	437	437	1	6e-155	0.9954	XP_017625813.1
	PREDICTED: peroxiredoxin Q, chloroplastic [Gossypium raimondii]	430	430	1	3e-152	0.9815	XP_012477281.1
	PREDICTED: peroxiredoxin Q, chloroplastic [Gossypium hirsutum]	424	424	1	5e-150	0.9722	XP_016720394.1
GhPRX8-D	PREDICTED: peroxiredoxin-2E, chloroplastic [Gossypium hirsutum]	454	454	1	3e-161	1	XP_016687489.1
	PREDICTED: peroxiredoxin-2E, chloroplastic [Gossypium raimondii]	449	898	1	2e-159	0.9912	XP_012468214.1
GhPRX7-A	PREDICTED: 1-Cys peroxiredoxin [Gossypium raimondii]	451	451	1	1e-160	0.9726	XP_012457278.1
	PREDICTED: 1-Cys peroxiredoxin-like [Gossypium hirsutum]	446	446	1	1e-158	0.9635	XP_016700896.1
GhPRX12-D	PREDICTED: peroxiredoxin-2B-like [Gossypium hirsutum]	325	325	1	9e-113	0.9938	XP_016720499.1
	PREDICTED: peroxiredoxin-2B [Theobroma cacao]	309	309	1	2e-106	0.9383	XP_007013115.2
	peroxiredoxin-2-like [Durio zibethinus]	309	309	1	3e-106	0.9198	XP_022755025.1
	peroxiredoxin-2 [Durio zibethinus]	309	309	1	3e-106	0.9259	XP_022730045.1
	peroxiredoxin-2 [Citrus sinensis]	300	300	1	9e-103	0.9074	XP_006475658.1
GhPRX13-D	PREDICTED: peroxiredoxin Q, chloroplastic [Gossypium raimondii]	438	438	1	2e-155	1	XP_012477281.1
	PREDICTED: peroxiredoxin Q, chloroplastic [Gossypium hirsutum]	432	432	1	4e-153	0.9907	XP_016720394.1
	PREDICTED: peroxiredoxin Q, chloroplastic [Gossypium arboreum]	432	432	1	5e-153	0.9861	XP_017625813.1
GhPRX1-A	PREDICTED: peroxiredoxin-2E, chloroplastic [Gossypium hirsutum]	445	445	1	8e-158	0.9824	XP_016687489.1
	PREDICTED: peroxiredoxin-2E, chloroplastic [Gossypium raimondii]	445	890	1	8e-158	0.9824	XP_012468214.1
GhPRX3-A	PREDICTED: peroxiredoxin-2B-like [Gossypium hirsutum]	332	332	1	4e-115	1	XP_016702396.1
	PREDICTED: peroxiredoxin-2B-like [Gossypium raimondii]	328	328	1	1e-113	0.9877	XP_012440686.1
	PREDICTED: peroxiredoxin-2B-like isoform X2 [Gossypium hirsutum]	326	326	1	4e-113	0.9815	XP_016684751.1
	PREDICTED: peroxiredoxin-2B-like [Gossypium arboreum]	325	325	1	9e-113	0.9815	XP_017605848.1
GrPRX2	PREDICTED: 2-Cys peroxiredoxin BAS1, chloroplastic [Gossypium raimondii]	539	539	1	0	1	XP_012441582.1
	PREDICTED: 2-Cys peroxiredoxin BAS1, chloroplastic-like [Gossypium hirsutum]	534	534	1	0	0.9849	XP_016738633.1
	PREDICTED: 2-Cys peroxiredoxin BAS1, chloroplastic [Theobroma cacao]	488	488	1	1e-173	0.8947	XP_017977630.1
	2-Cys peroxiredoxin BAS1, chloroplastic-like isoform X1 [Durio zibethinus]	484	484	1	4e-172	0.9023	XP_022766982.1
	PREDICTED: 2-Cys peroxiredoxin BAS1, chloroplastic-like [Gossypium hirsutum]	475	475	0.89	2e-168	0.9958	XP_016679231.1
GaPRX3	PREDICTED: peroxiredoxin-2B-like [Gossypium arboreum]	335	335	1	2e-116	1	XP_017611576.1
	PREDICTED: peroxiredoxin-2B-like [Gossypium raimondii]	328	328	1	1e-113	0.9816	XP_012445837.1
	PREDICTED: peroxiredoxin-2B-like [Gossypium hirsutum]	325	325	1	1e-112	0.9755	XP_016750088.1
	PREDICTED: peroxiredoxin-2B-like [Gossypium hirsutum]	296	296	0.89	4e-101	0.9795	XP_016689954.1
GrPRX1	PREDICTED: peroxiredoxin-2B-like [Gossypium raimondii]	331	331	1	5e-115	1	XP_012440686.1
	PREDICTED: peroxiredoxin-2B-like isoform X2 [Gossypium hirsutum]	330	330	1	2e-114	0.9938	XP_016684751.1
	PREDICTED: peroxiredoxin-2B-like [Gossypium hirsutum]	328	328	1	1e-113	0.9877	XP_016702396.1
	PREDICTED: peroxiredoxin-2B-like [Gossypium arboreum]	326	326	1	7e-113	0.9815	XP_017605848.1
GrPRX8	PREDICTED: peroxiredoxin Q, chloroplastic [Gossypium raimondii]	286	286	0.62	2e-95	1	XP_012477281.1
	PREDICTED: peroxiredoxin Q, chloroplastic [Gossypium arboreum]	281	281	0.62	2e-93	0.9792	XP_017625813.1
GrPRX4	PREDICTED: peroxiredoxin-2F, mitochondrial isoform X1 [Gossypium raimondii]	414	414	1	2e-146	1	XP_012456437.1
	PREDICTED: peroxiredoxin-2F, mitochondrial isoform X2 [Gossypium raimondii]	397	397	1	9e-140	0.9754	XP_012456438.1
	PREDICTED: peroxiredoxin-2F, mitochondrial-like [Gossypium hirsutum]	389	389	1	1e-136	0.9557	XP_016724513.1
	PREDICTED: peroxiredoxin-2F, mitochondrial [Gossypium arboreum]	385	385	1	4e-135	0.9458	XP_017608166.1
GrPRX5	PREDICTED: 1-Cys peroxiredoxin-like [Gossypium hirsutum]	453	453	1	2e-161	0.9909	XP_016700896.1
	PREDICTED: 1-Cys peroxiredoxin-like [Gossypium hirsutum]	451	451	1	1e-160	0.9726	XP_016677273.1
GaPRX5	PREDICTED: peroxiredoxin-2E, chloroplastic [Gossypium raimondii]	449	449	1	1e-159	0.9912	XP_012468214.1
GaPRX4	PREDICTED: 2-Cys peroxiredoxin BAS1, chloroplastic-like [Gossypium arboreum]	539	539	1	0	1	XP_017615619.1
	PREDICTED: 2-Cys peroxiredoxin BAS1, chloroplastic [Gossypium raimondii]	537	537	1	0	0.9925	XP_012441582.1
	PREDICTED: 2-Cys peroxiredoxin BAS1, chloroplastic-like [Gossypium hirsutum]	534	534	1	0	0.9887	XP_016738633.1
	PREDICTED: 2-Cys peroxiredoxin BAS1, chloroplastic [Theobroma cacao]	488	488	1	8e-174	0.8947	XP_017977630.1
	2-Cys peroxiredoxin BAS1, chloroplastic-like isoform X1 [Durio zibethinus]	484	484	1	4e-172	0.9023	XP_022766982.1
	PREDICTED: 2-Cys peroxiredoxin BAS1, chloroplastic-like [Gossypium hirsutum]	474	474	0.89	7e-168	0.9873	XP_016679231.1
GaPRX3	PREDICTED: peroxiredoxin-2B-like [Gossypium arboreum]	335	335	1	2e-116	1	XP_017611576.1
	PREDICTED: peroxiredoxin-2B-like [Gossypium hirsutum]	325	325	1	1e-112	0.9755	XP_016750088.1
GaPRX1	PREDICTED: peroxiredoxin-2B-like [Gossypium arboreum]	332	332	1	2e-115	1	XP_017605848.1
	PREDICTED: peroxiredoxin-2B-like [Gossypium raimondii]	326	326	1	7e-113	0.9815	XP_012440686.1
	PREDICTED: peroxiredoxin-2B-like [Gossypium hirsutum]	325	325	1	9e-113	0.9815	XP_016702396.1
	PREDICTED: peroxiredoxin-2B-like isoform X2 [Gossypium hirsutum]	325	325	1	2e-112	0.9753	XP_016684751.1
GaPRX6	PREDICTED: peroxiredoxin Q, chloroplastic [Gossypium arboreum]	439	439	1	8e-156	1	XP_017625813.1
	PREDICTED: peroxiredoxin Q, chloroplastic [Gossypium raimondii]	432	432	1	5e-153	0.9861	XP_012477281.1
GaPRX8	PREDICTED: 1-Cys peroxiredoxin-like [Gossypium hirsutum]	418	418	1	1e-147	0.9315	XP_016677273.1
GbPRX4-A	PREDICTED: peroxiredoxin-2E, chloroplastic [Gossypium hirsutum]	445	445	1	8e-158	0.9824	XP_016687489.1
	PREDICTED: peroxiredoxin-2E, chloroplastic [Gossypium raimondii]	445	445	1	8e-158	0.9824	XP_012468214.1
GbPRX10-D	PREDICTED: peroxiredoxin-2E, chloroplastic [Gossypium raimondii]	445	445	1	6e-158	0.9868	XP_012468214.1
GbPRX8-D	PREDICTED: 2-Cys peroxiredoxin BAS1, chloroplastic [Gossypium raimondii]	536	536	1	0	0.9962	XP_012441582.1
	PREDICTED: 2-Cys peroxiredoxin BAS1, chloroplastic-like [Gossypium arboreum]	535	535	1	0	0.9887	XP_017615619.1
	PREDICTED: 2-Cys peroxiredoxin BAS1, chloroplastic-like [Gossypium hirsutum]	530	530	1	0	0.9811	XP_016738633.1
GbPRX13-D	PREDICTED: peroxiredoxin-2B-like [Gossypium arboreum]	296	296	1	3e-101	0.9795	XP_017611576.1
	PREDICTED: peroxiredoxin-2B-like [Gossypium hirsutum]	295	295	1	4e-101	0.9795	XP_016750088.1
GbPRX9-D	PREDICTED: peroxiredoxin Q, chloroplastic [Gossypium raimondii]	438	438	1	2e-155	1	XP_012477281.1
	PREDICTED: peroxiredoxin Q, chloroplastic [Gossypium arboreum]	432	432	1	5e-153	0.9861	XP_017625813.1
GbPRX14-D	PREDICTED: 1-Cys peroxiredoxin-like [Gossypium hirsutum]	458	458	1	3e-163	1	XP_016700896.1
	PREDICTED: 1-Cys peroxiredoxin-like [Gossypium hirsutum]	446	446	1	1e-158	0.9635	XP_016677273.1
GbPRX6-A	PREDICTED: peroxiredoxin-2B-like [Gossypium hirsutum]	332	332	1	4e-115	1	XP_016702396.1
	PREDICTED: peroxiredoxin-2B-like [Gossypium raimondii]	328	328	1	1e-113	0.9877	XP_012440686.1
	PREDICTED: peroxiredoxin-2B-like isoform X2 [Gossypium hirsutum]	326	326	1	4e-113	0.9815	XP_016684751.1
	PREDICTED: peroxiredoxin-2B-like [Gossypium arboreum]	325	325	1	9e-113	0.9815	XP_017605848.1
GbPRX2-A	PREDICTED: peroxiredoxin Q, chloroplastic [Gossypium arboreum]	437	437	1	6e-155	0.9954	XP_017625813.1
	PREDICTED: peroxiredoxin Q, chloroplastic [Gossypium raimondii]	430	430	1	3e-152	0.9815	XP_012477281.1
GbPRX5-A	PREDICTED: peroxiredoxin-2F, mitochondrial-like [Gossypium hirsutum]	403	403	1	4e-142	1	XP_016724513.1
	PREDICTED: peroxiredoxin-2F, mitochondrial [Gossypium arboreum]	398	398	1	4e-140	0.9899	XP_017608166.1
	PREDICTED: peroxiredoxin-2F, mitochondrial isoform X2 [Gossypium raimondii]	396	396	1	2e-139	0.9798	XP_012456438.1
	PREDICTED: peroxiredoxin-2F, mitochondrial isoform X1 [Gossypium raimondii]	389	389	1	1e-136	0.9557	XP_012456437.1
GbPRX1-A	PREDICTED: 1-Cys peroxiredoxin-like [Gossypium hirsutum]	459	459	1	1e-163	1	XP_016677273.1
	PREDICTED: 1-Cys peroxiredoxin-like [Gossypium hirsutum]	446	446	1	1e-158	0.9635	XP_016700896.1
GbPRX7-D	PREDICTED: peroxiredoxin-2F, mitochondrial isoform X2 [Gossypium raimondii]	398	398	1	3e-140	0.9848	XP_012456438.1
	PREDICTED: peroxiredoxin-2F, mitochondrial-like [Gossypium hirsutum]	395	395	1	6e-139	0.9747	XP_016724513.1
	PREDICTED: peroxiredoxin-2F, mitochondrial isoform X1 [Gossypium raimondii]	392	392	1	7e-138	0.9606	XP_012456437.1
	PREDICTED: peroxiredoxin-2F, mitochondrial [Gossypium arboreum]	390	390	1	6e-137	0.9646	XP_017608166.1
